# Supplementary material for: Isolation, Purification, and Characterisation of a Phage Tail-Like Bacteriocin from the Insect Pathogenic Bacterium Brevibacillus laterosporus
Source: MDPI journal article supplement (doi:10.3390/biom12081154), 2022-08-20

## Supplementary Material (SM)

**Table S1. Spectrophotometer reading (OD<sub>600nm</sub>) of *B/ 1821L* culture after treatment with the mitomycin C at various concentrations.**

| Treatments                        | Time intervals<br>(Hours) |      |      |      |      | % Decrease<br>in OD <sub>600nm</sub> |
|-----------------------------------|---------------------------|------|------|------|------|--------------------------------------|
|                                   | 0                         | 2    | 4    | 6    | 24   |                                      |
| Mitomycin C<br>(1 µg/mL)          | 1.41                      | 1.44 | 1.46 | 1.48 | 0.71 | 49.65                                |
| Mitomycin C<br>(3 µg/mL)          | 1.56                      | 1.56 | 1.57 | 1.58 | 0.92 | 41.03                                |
| Control                           | 1.30                      | 1.34 | 1.47 | 1.49 | 1.35 | -3.85                                |
| *LSD (5%)<br>(Control vs Treated) | 0.18                      | 0.15 | 0.12 | 0.12 | 0.37 | 24.49                                |
| LSD (5%)<br>(**MMC1 vs ***MMC3)   | 0.16                      | 0.14 | 0.12 | 0.11 | 0.34 | 22.68                                |

Note: \*LSD= Least significant digit

\*\*MMC1= Mitomycin C @ 1 µg/mL

\*\*\*MMC3= Mitomycin C @ 3 µg/mL

*Brevibacillus laterosporus* 1821L cell free supernatant activity after PEG 8000 precipitation

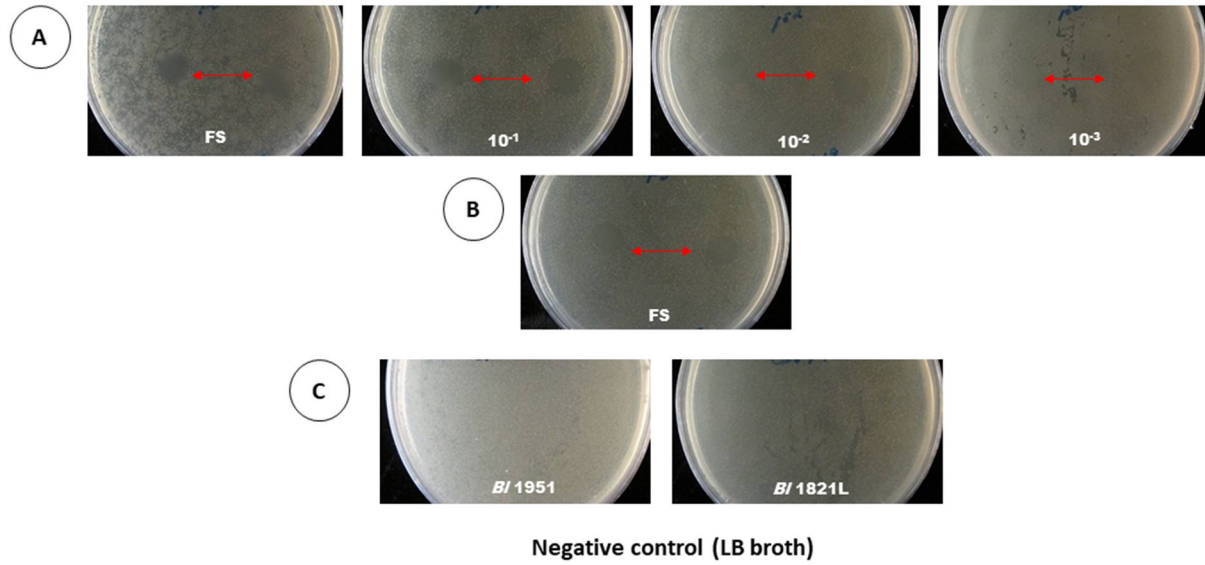

**Figure S1.** Antibacterial activity of *B/ 1821L* cell free supernatant after PEG 8000 precipitation in the serial dilutions assay test against *B/ 1951* as the host bacterium (A) and *B/ 1821L* as the host bacterium (B). Arrows (red colour) denote the zones of inhibition due to the activity of PEG 8000 precipitated putative antibacterial proteins. LB broth was used as a negative control against both the strains (*B/ 1951* & *B/ 1821L*) (C).

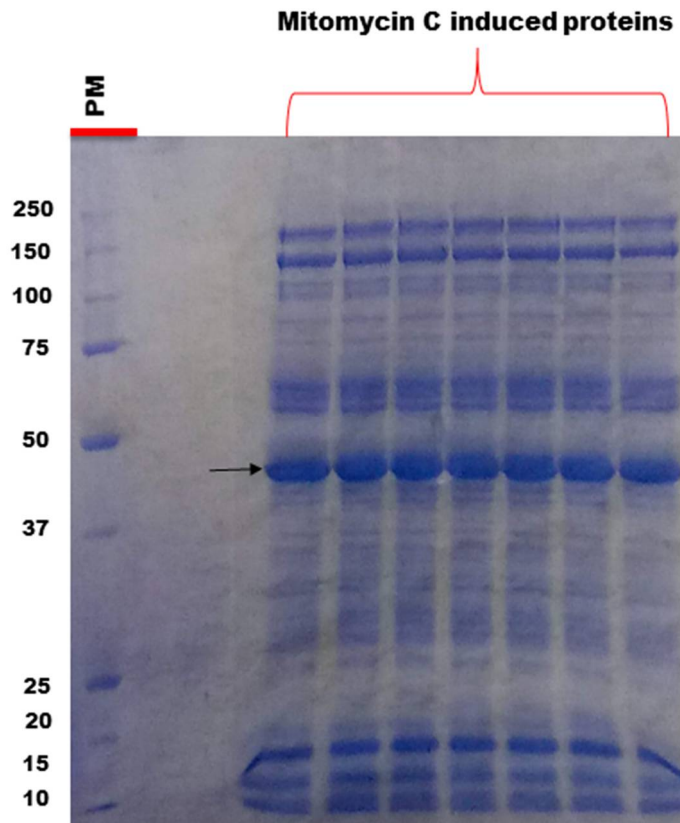

**Figure S2. SDS-PAGE of mitomycin C induced culture of *B/ 1821L* showing a prominent band of ~48 kD (shown with dark arrow).**

Note: Based on its prominence, ~48 kD protein band was hypothesised to be involved in the putative antibacterial activity. Therefore, the band was excised for preliminary N-terminal sequencing and the resultant short sequence amino acids revealed several hits (covering 70% of the amino acid sequence) to the loci A0A518VEB0 in the *B/ 1821L* genome (NZ\_CP033464.1) encoding a predicted defective phage protein, similar to that encoded by the *Bs 168* phage-like element PBSX gene *xkdK*. Furthermore, these findings were authenticated with the subsequent TEM examination, SDS-PAGE, N-terminal sequencing, and bioinformatic analysis of purified ~48 kD protein.

**Refer to N-terminal sequencing of ~48 kD crude protein:**

(<https://data.lincoln.ac.nz/ndownloader/files/30948223>)

*Brevibacillus laterosporus* 1821L induced cultures after PEG 8000 precipitation

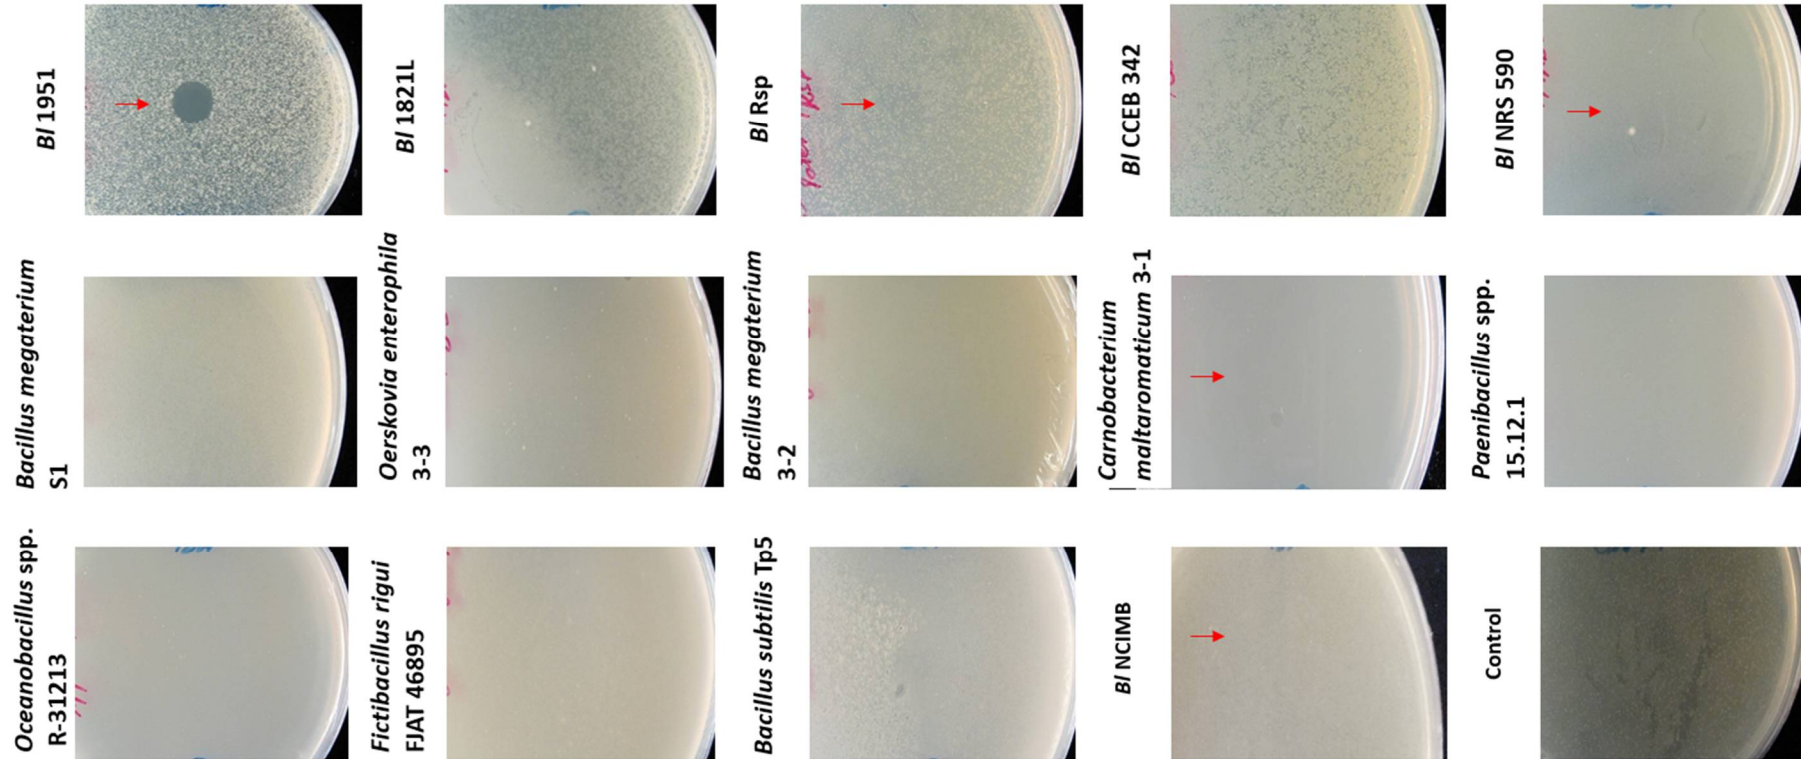

Figure S3. Antibacterial activity of *BI* 1821L induced culture cell free supernatant after PEG 8000 precipitation against various gram-positive bacteria. Arrows (red colour) denote the zone of inhibition due to the activity of PEG 8000 precipitated putative antibacterial proteins.



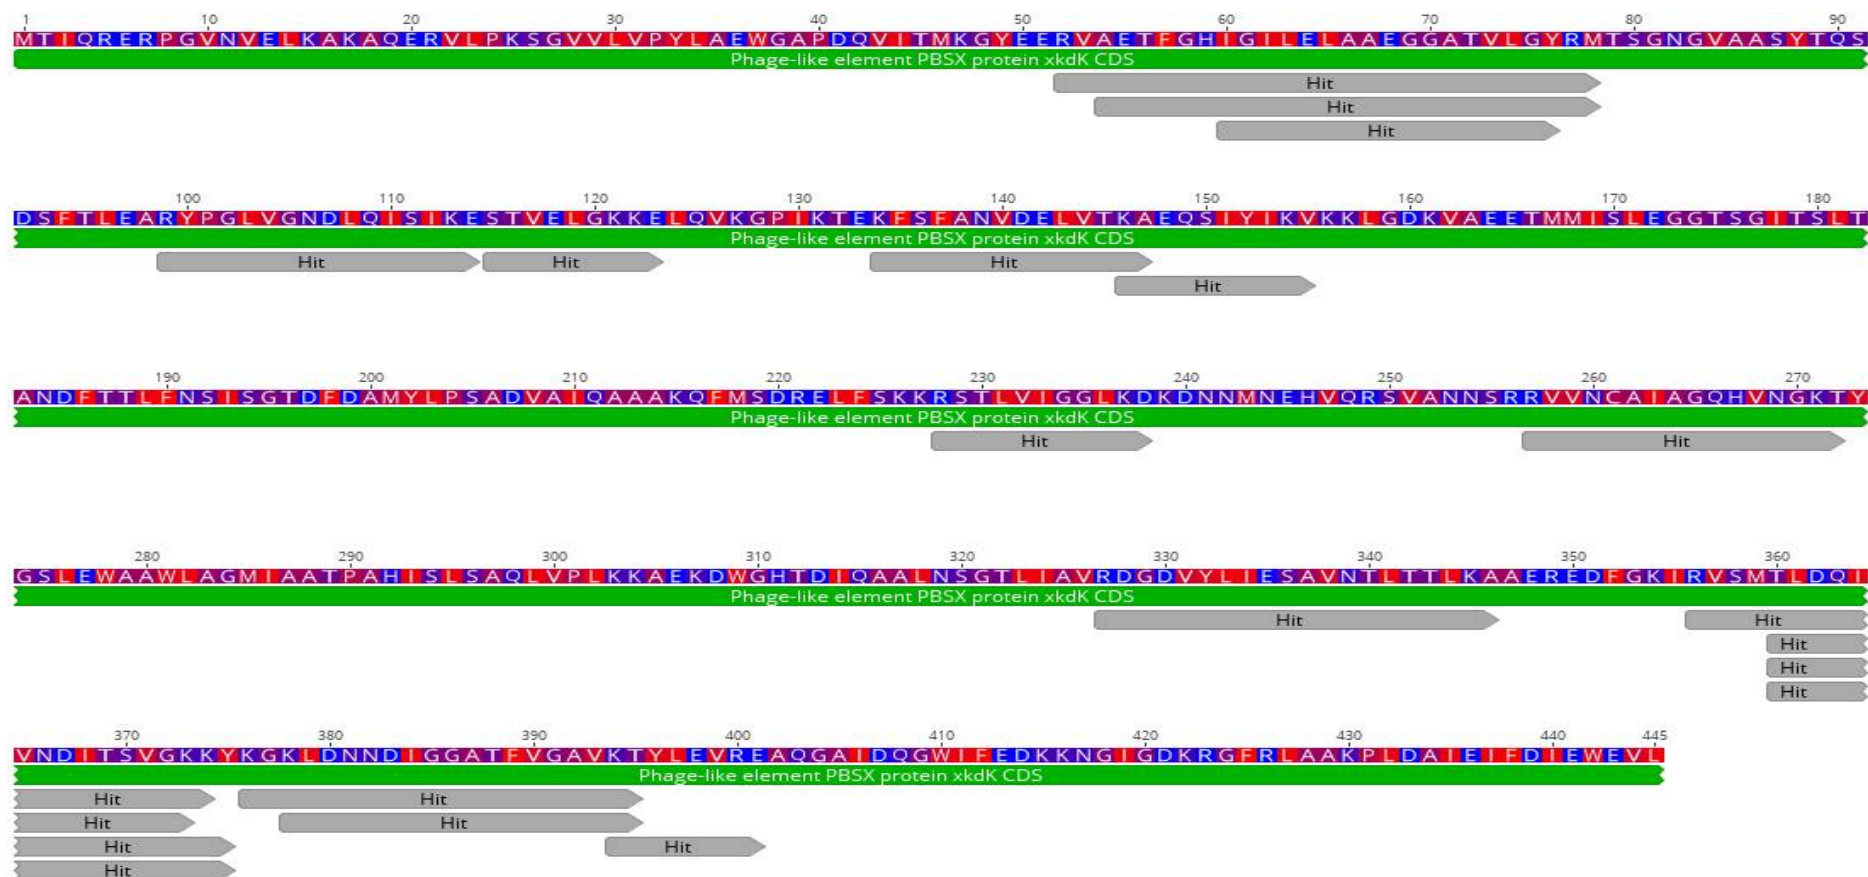

Figure S4. N-terminal sequenced short amino acid match hits to the putative phage tail protein (~48 kD) encoded in *B/ 1821L* genome.

Refer to N-terminal sequencing of ~48 kD purified protein: (<https://data.lincoln.ac.nz/ndownloader/files/30948616>)

**Table S2. Similar proteins to the ~48 kD identified putative phage tail protein of *BI 1821L* in the Uniprot database.**

| Similar proteins          | Organism                                                              | Gene name                                   | Length |
|---------------------------|-----------------------------------------------------------------------|---------------------------------------------|--------|
| Phage tail protein        | <i>Brevibacillus laterosporus</i><br>( <i>Bacillus laterosporus</i> ) | C4A76_07870,<br>C4A77_13935,<br>D5F52_00915 | 445    |
| Phage tail protein        | <i>Brevibacillus laterosporus</i><br>( <i>Bacillus laterosporus</i> ) | EX87_06735                                  | 445    |
| Phage tail-sheath protein | <i>Brevibacillus laterosporus</i> LMG 15441                           | BRLA_c036460                                | 462    |
| Uncharacterised protein   | <i>Brevibacillus borstelensis</i> GI-9                                | BLGI_826                                    | 445    |
| Phage tail protein        | <i>Brevibacillus laterosporus</i><br>( <i>Bacillus laterosporus</i> ) | EEL32_11960                                 | 445    |
| Phage tail protein        | <i>Brevibacillus laterosporus</i> SKDU 10                             | AYJO8_14030                                 | 445    |
| Phage tail protein        | <i>Brevibacillus laterosporus</i><br>( <i>Bacillus laterosporus</i> ) | EX87_02320                                  | 445    |
| Phage tail protein        | <i>Brevibacillus laterosporus</i><br>( <i>Bacillus laterosporus</i> ) | D5F52_16160                                 | 445    |
| Phage tail protein        | <i>Brevibacillus laterosporus</i><br>( <i>Bacillus laterosporus</i> ) | C4A76_21720                                 | 445    |

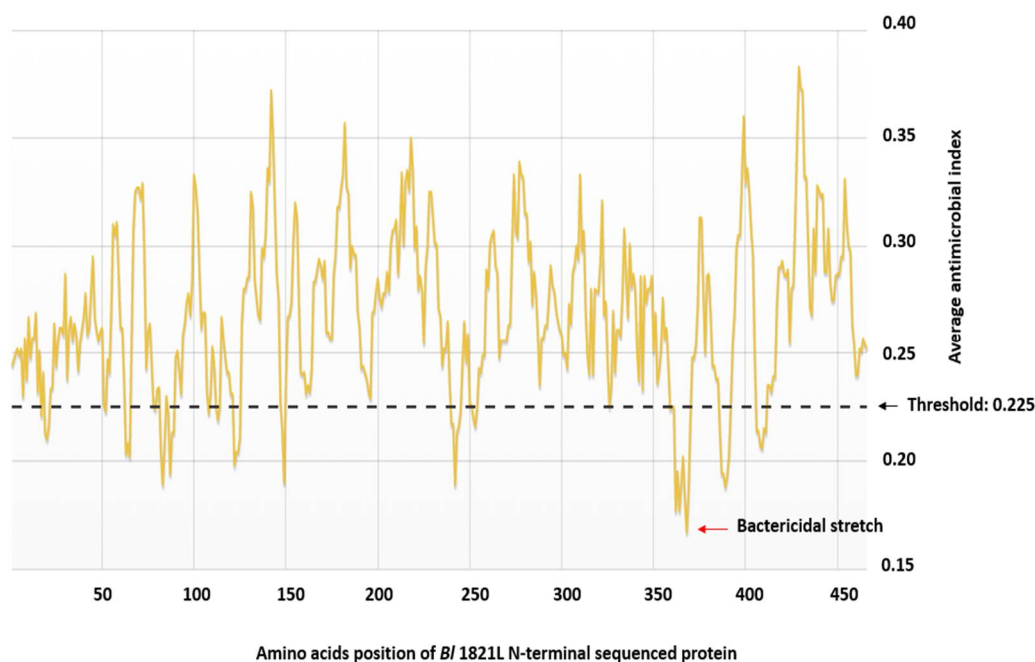

**Figure S5. AMPA analysis of identified phage tail-sheath protein of *B/ 1821L*. Identified bactericidal motif is indicated is pointed with red arrow.**

```

1   MNGGTFTTGKEKERAGIYFNFKTTAQERVLSERGTVALPVASSWGEAKTFVSISSVEDL
61  NKKVGLSIDDPSLLLLREAKKNAKTVLMYRLTEGVRASADIAEGVKATAVYGGTKGNDII
121 IRINQNVLDANSFDVTTYMDESEVDKQTVKKAEELTANGYVFTGTGDLSTIPLTGSEG
181 DTAAETLNASAGIRLSGGTDKAPVNSDYTDFLAAAETESFDVIALPVAEGDQLKATFAAF
241 IKRLRDGQGQKVQGVGTANYAGDYEGIINVTEGVLLLEDGTEVTPDKATAWVAGASAGATN
301 QSLTFVEYEGAVDVLHRLDHDITIVERLGKGFLFTFDARDKSVSVEKDINSLVTFTAEN
361 KKFAKNKIVRVLDAVNNDLTRELKALIKSRKSGSDIPASEDGLQYVKTMITQYMTTLQD
421 AGGITGFDSDEEDITISMNEDRDGFLIDLAVQPVDAAEKFYFNVEVN

```

**Figure S6. AMPA analysis of identified phage-like element PBSX protein XkdK of *B/ 1821L*. Amino acids (360-373) corresponding to the bactericidal stretch are highlighted in red colour.**

**Table S3. Effect of crude *B/ 1821L* putative antibacterial proteins (ABPs) on the number of viable cells of *B/ 1821L* and *B/ 1951* after incubation at 30°C for various time intervals. Data presents the mean values of four experiments. Values of % decrease/increase in the number of viable cells are calculated from CFUs values of corresponding time intervals.**

| Time intervals<br>(Hours) | <i>B/ 1821L</i>       | <i>B/ 1821L</i><br>+<br><i>B/ 1821L</i> crude ABPs | % Decrease/increase<br>in no. of viable cells | <i>B/ 1951</i>      | <i>B/ 1951</i><br>+<br><i>B/ 1821L</i> crude ABPs | % Decrease/increase<br>in no. of viable cells | *LSD (5%) |
|---------------------------|-----------------------|----------------------------------------------------|-----------------------------------------------|---------------------|---------------------------------------------------|-----------------------------------------------|-----------|
| 1                         | 4.46E+06<br>(6.650)** | 5.56E+06<br>(6.745)                                | -24.65                                        | 3.18E+06<br>(6.502) | 4.19E+06<br>(6.622)                               | -31.89                                        | 0.350     |
| 3                         | 3.70E+06<br>(6.568)   | 3.85E+06<br>(6.585)                                | -4.05                                         | 3.64E+06<br>(6.561) | 4.93E+06<br>(6.692)                               | -35.40                                        | 0.281     |
| 6                         | 3.58E+06<br>(6.553)   | 2.50E+06<br>(6.398)                                | 30.07                                         | 3.74E+06<br>(6.573) | 5.80E+06<br>(6.763)                               | -55.18                                        | 0.377     |
| 12                        | 1.18E+07<br>(7.071)   | 1.10E+07<br>(7.043)                                | 6.36                                          | 9.15E+06<br>(6.961) | 1.33E+07<br>(7.123)                               | -45.22                                        | 0.312     |
| 18                        | 1.35E+07<br>(7.131)   | 1.67E+07<br>(7.223)                                | -23.57                                        | 1.05E+07<br>(7.023) | 1.17E+07<br>(7.068)                               | -11.03                                        | 0.228     |
| 24                        | 1.72E+07<br>(7.236)   | 1.50E+07<br>(7.177)                                | 12.71                                         | 5.58E+06<br>(6.746) | 7.89E+06<br>(6.897)                               | -41.48                                        | 0.317     |

\*=Least significant difference

\*\*=The values in parenthesis indicate the converted value of number of viable cells (CFU/mL) into log<sub>10</sub> CFU/mL.

**Table S4. Effect of crude *B/ 1821* putative antibacterial proteins (ABPs) on the OD<sub>600nm</sub> reading of *B/ 1821L* and *B/ 1951* after incubation at 30°C for various time intervals. Data presents the mean values of four experiments.**

| Time intervals<br>(Hours)                                                       | <i>B/ 1821L</i> | <i>B/ 1821L</i><br>+<br><i>B/ 1821L</i> crude ABPs | % Decrease/increase<br>in OD <sub>600nm</sub> reading | <i>B/ 1951</i> | <i>B/ 1951</i><br>+<br><i>B/ 1821L</i> crude ABPs | % Decrease/increase<br>in OD <sub>600nm</sub> reading | *LSD (5%) |
|---------------------------------------------------------------------------------|-----------------|----------------------------------------------------|-------------------------------------------------------|----------------|---------------------------------------------------|-------------------------------------------------------|-----------|
| 1                                                                               | 1.99            | 1.99                                               | 0.00                                                  | 1.92           | 1.90                                              | 1.14                                                  | 0.061     |
| 3                                                                               | 1.87            | 1.85                                               | 0.67                                                  | 1.74           | 1.73                                              | 0.43                                                  | 0.121     |
| 6                                                                               | 1.65            | 1.63                                               | 1.21                                                  | 1.58           | 1.55                                              | 1.51                                                  | 0.148     |
| 12                                                                              | 1.29            | 1.26                                               | 2.32                                                  | 1.45           | 1.39                                              | 4.57                                                  | 0.135     |
| 18                                                                              | 1.23            | 1.21                                               | 1.63                                                  | 1.24           | 1.25                                              | -0.10                                                 | 0.227     |
| 24                                                                              | 1.25            | 1.18                                               | 5.51                                                  | 1.29           | 1.18                                              | 8.36                                                  | 0.237     |
| % Decrease from<br>the start (1 hour) to<br>the end (24 hours)<br>of incubation | 37.2%           | 40.7%                                              |                                                       | 32.8%          | 37.9%                                             |                                                       |           |

\*=Least significant difference

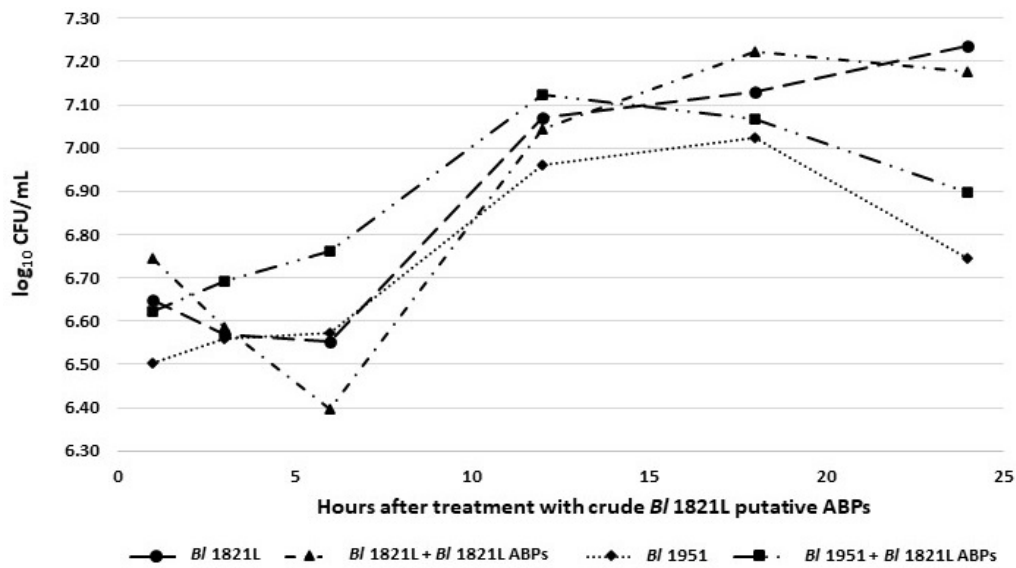

Figure S7. Number of viable cells (log<sub>10</sub> CFU/mL) of *B/ 1821L* and *B/ 1951* with/without treatment of crude *B/ 1821L* putative antibacterial proteins (ABPs) after incubation at 30°C over 24 hours.

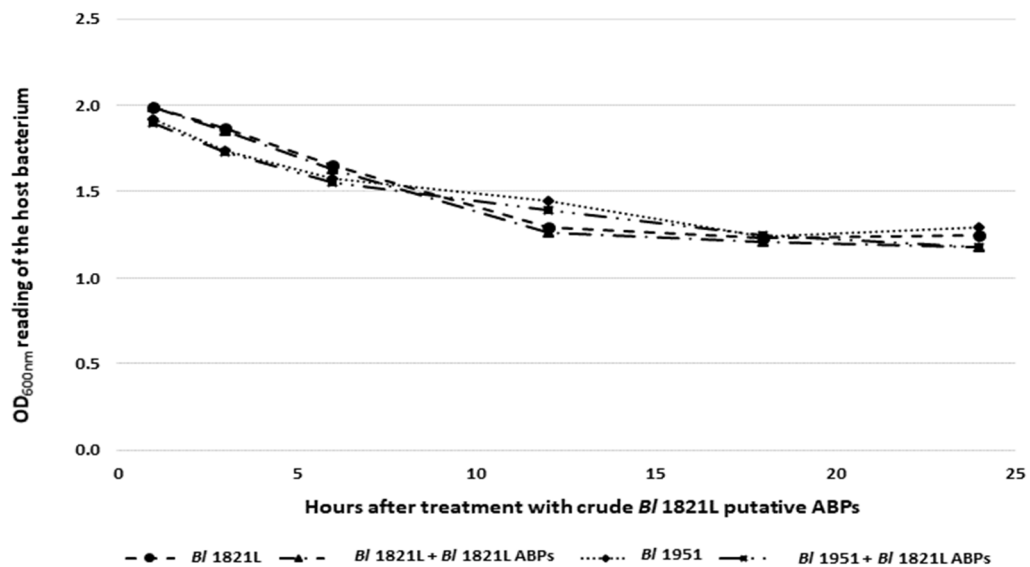

Figure S8. Effect of crude *B/ 1821* putative antibacterial proteins (ABPs) on the OD<sub>600nm</sub> reading of *B/ 1821L* and *B/ 1951* after incubation at 30°C for various time intervals.

**Table S5. Effect of purified *B/ 1821L* putative ~48 kD phage tail-like protein (PTLP) on the number of viable cells of *B/ 1821L* and *B/ 1951* after incubation at 30°C for various time intervals. Data presents the mean values of one experiment. Values of % decrease/increase in the number of viable cells are calculated from CFUs values of corresponding time intervals .**

| Time intervals<br>(Hours) | <i>B/ 1821L</i>      | <i>B/ 1821L</i><br>+<br><i>B/ 1821L</i> PTLP | % Decrease/increase<br>in no. of viable cells | <i>B/ 1951</i>      | <i>B/ 1951</i><br>+<br><i>B/ 1821L</i> PTLP | % Decrease/increase<br>in no. of viable cells |
|---------------------------|----------------------|----------------------------------------------|-----------------------------------------------|---------------------|---------------------------------------------|-----------------------------------------------|
| 1                         | 1.74E+07<br>(7.241)* | 2.81E+07<br>(7.448)                          | -61.21                                        | 9.05E+06<br>(6.957) | 1.66E+07<br>(7.220)                         | -83.43                                        |
| 3                         | 2.41E+07<br>(7.381)  | 2.16E+07<br>(7.334)                          | 10.19                                         | 6.20E+06<br>(6.792) | 8.80E+06<br>(6.944)                         | -41.94                                        |
| 6                         | 1.13E+07<br>(7.051)  | 1.64E+07<br>(7.215)                          | -45.78                                        | 1.17E+07<br>(7.066) | 1.08E+07<br>(7.031)                         | 7.73                                          |
| 12                        | 2.34E+07<br>(7.369)  | 2.14E+07<br>(7.330)                          | 8.55                                          | 2.58E+07<br>(7.411) | 2.01E+07<br>(7.302)                         | 22.14                                         |
| 18                        | 1.68E+07<br>(7.224)  | 2.78E+07<br>(7.443)                          | -65.67                                        | 2.37E+07<br>(7.375) | 1.56E+07<br>(7.193)                         | 34.18                                         |
| 24                        | 2.33E+07<br>(7.366)  | 2.87E+07<br>(7.457)                          | -23.23                                        | 1.87E+07<br>(7.271) | 2.03E+07<br>(7.307)                         | -8.85                                         |

\*= The values in parenthesis indicate the number of viable cells (CFUs/mL) converted into log<sub>10</sub> CFU/mL.



**Table S6. Effect of purified *B/ 1821L* ~48 kD putative phage tail-like protein (PTLP) on the OD<sub>600nm</sub> reading of *B/ 1821L* and *B/ 1951* after incubation at 30°C for various time intervals. Data presents the mean values of one experiment.**

| <b>Time intervals<br/>(Hours)</b>                                                         | <b><i>B/ 1821L</i></b> | <b><i>B/ 1821L</i><br/>+<br/><i>B/ 1821L</i> PTLP</b> | <b>% Decrease/increase<br/>in OD<sub>600nm</sub> reading</b> | <b><i>B/ 1951</i></b> | <b><i>B/ 1951</i><br/>+<br/><i>B/ 1821L</i> PTLP</b> | <b>% Decrease/increase<br/>in OD<sub>600nm</sub> reading</b> |
|-------------------------------------------------------------------------------------------|------------------------|-------------------------------------------------------|--------------------------------------------------------------|-----------------------|------------------------------------------------------|--------------------------------------------------------------|
| 1                                                                                         | 3.40                   | 3.20                                                  | 5.88                                                         | 2.89                  | 2.90                                                 | -0.35                                                        |
| 3                                                                                         | 1.99                   | 1.98                                                  | 0.50                                                         | 1.93                  | 1.91                                                 | 1.04                                                         |
| 6                                                                                         | 1.70                   | 1.61                                                  | 5.01                                                         | 1.76                  | 1.79                                                 | -1.70                                                        |
| 12                                                                                        | 1.26                   | 1.30                                                  | -3.59                                                        | 1.65                  | 1.68                                                 | -1.82                                                        |
| 18                                                                                        | 1.19                   | 1.27                                                  | -6.30                                                        | 1.58                  | 1.59                                                 | -0.63                                                        |
| 24                                                                                        | 1.14                   | 1.21                                                  | -6.14                                                        | 1.43                  | 1.50                                                 | -4.90                                                        |
| <b>% Decrease from<br/>the start (1 hour) to<br/>the end (24 hours)<br/>of incubation</b> | 66.5%                  | 62.2%                                                 |                                                              |                       | 50.5%                                                | 48.3%                                                        |

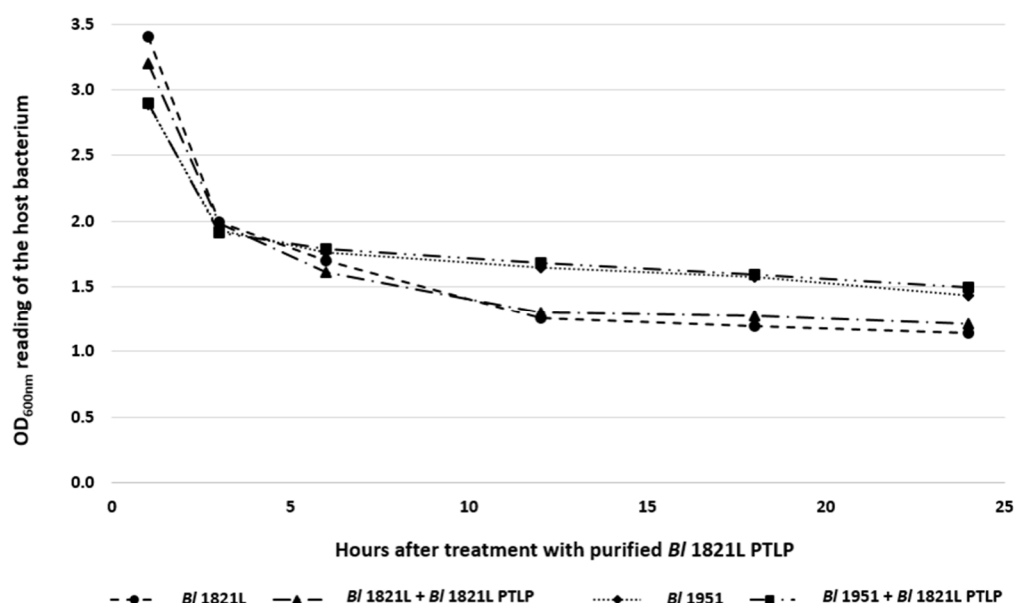

**Figure S9.** Effect of purified *B/ 1821* putative phage tail-like protein (~48 kD) on the OD<sub>600nm</sub> reading of *B/ 1821L* and *B/ 1951* after incubation at 30°C for various time intervals.

**Table S7.** Phage-like element PBSX protein XkdK and phage tail-sheath proteins from different gram-positive bacteria.

| Accession   | Protein name                 | Organism                                                      |
|-------------|------------------------------|---------------------------------------------------------------|
| A0A0D1WNL8  | Phage tail sheath            | <i>Aneurinibacillus migulanus</i>                             |
| A0A410KN98I | Phage tail sheath            | <i>Bacillus aerophilus</i>                                    |
| R4JQA6      | Structural protein           | <i>Bacillus</i> phage PBP180                                  |
| A0A5B0B6Z4  | Phage-like element PBSX XkdK | <i>Bacillus</i> sp. ANT_WA51                                  |
| A0A410QZ71  | Phage-like element PBSX XkdK | <i>Bacillus</i> sp. WR11                                      |
| A0A6H0H1P2  | Phage-like element PBSX XkdK | <i>Bacillus subtilis</i> subsp. <i>subtilis</i> str. SMY      |
| P54331      | Phage-like element PBSX XkdK | <i>Bacillus subtilis</i> 168                                  |
| C0Z5G9      | Uncharacterised protein      | <i>Brevibacillus brevis</i> (strain 47/JCM 6285/ NBRC 100599) |
| A0A3M8B733  | Phage tail                   | <i>Brevibacillus gelatini</i>                                 |
| A0A075R9L5  | Phage tail sheath            | <i>Brevibacillus laterosporus</i> LMG 15441                   |
| Q18BN0      | Phage-like element PBSX XkdK | <i>Clostridioides difficile</i> 630                           |
| A0A061P351  | Phage-like element PBSX XkdK | <i>Geomicrobium</i> sp. JCM 19039                             |

Figure S10. Amino acids alignment of identified *B/* 1821L and *B/* 1951 phage like-element PBSX protein XkdK (A0A518VEB0) with the similar proteins of other gram-positive bacteria (See SM Table 7) using the programme CLUSTALO.

|            |                  |     |                                                               |     |
|------------|------------------|-----|---------------------------------------------------------------|-----|
| A0A0D1WNL8 | A0A0D1WNL8_ANEMI | 1   | -----MAGGTFQTGERKVRPGFYARFISAAQDRIAVAPRGTVILPLTLNWGRAKE       | 50  |
| A0A3M8B733 | A0A3M8B733_9BACL | 1   | -----MTIQREPRGVIVELIAKAKERV-VPKSGVVLVPYQAEWGAPDE              | 42  |
| A0A5B0B6Z4 | A0A5B0B6Z4_9BACI | 1   | -----MNGGFTTTGKEKERAGIYFNFKTTAQERVSLSERGTVALPVASSWGAEKT       | 50  |
| A0A6H0H1P2 | A0A6H0H1P2_BACIU | 1   | -----MNGGFTTTGKEKERAGIYFNFKTTAQERVSLSERGTVALPVASSWGAEKT       | 50  |
| A0A061P351 | A0A061P351_9BACL | 1   | -----MNGGTFAPGVEKERAGIYFRFTSAANDRLSVGERGTVALPLELSWGAPKT       | 50  |
| A0A075R9L5 | A0A075R9L5_BRELA | 1   | MKNKYDNTYLHFEENVSMITIQREPRGVNVELKAKAQERV-LPKSGVVLVPYLAEWGAPDQ | 59  |
| A0A410KN98 | A0A410KN98_9BACI | 1   | -----MNGGFTTPGTEKKRPGIYFNFKTTAEQRITLGERGTVALPLVMSWGEPKT       | 50  |
| A0A410QZ71 | A0A410QZ71_9BACI | 1   | -----MNGGFTTTGKEKERAGIYFNFKTTAQERVSLSERGTVALPVASSWGAEKT       | 50  |
| A0A518VEB0 | A0A518VEB0_BRELA | 1   | -----MTIQREPRGVNVELKAKAQERV-LPKSGVVLVPYLAEWGAPDQ              | 42  |
| C0Z5G9     | C0Z5G9_BREBN     | 1   | -----MTIQREPRGVIVELIAKAKERV-VPKSGVVLVPYQAEWGAPDE              | 42  |
| Q18BN0     | Q18BN0_CLOD6     | 1   | -----                                                         | 0   |
| R4JQA6     | R4JQA6_9CAUD     | 1   | -----MNGGFTTPGTEKKRPGIYFNFKTTAEQRITLGERGTVALPLVMSWGEPKT       | 50  |
| P54331     | XKDK_BACSU       | 1   | -----MNGGFTTTGKEKERAGIYFNFKTTAQERVSLSERGTVALPVASSWGAEKT       | 50  |
|            |                  |     |                                                               |     |
| A0A0D1WNL8 | A0A0D1WNL8_ANEMI | 51  | FTTIEVEKDTMDKLGVDYNDPEMLLIREARKLAKKVVKYKLNKGEKAKGTFGTT-----   | 104 |
| A0A3M8B733 | A0A3M8B733_9BACL | 43  | LVKLGSYEERMETTF-----GKVDIVELAAEGGATILAYRMTNGNASKAVYEQA-----   | 91  |
| A0A5B0B6Z4 | A0A5B0B6Z4_9BACI | 51  | FVSISSEDVLDNKKVGLSIDDPSLLLLREAKKNAKTIVLMYRLTEGVRSADIA-----    | 102 |
| A0A6H0H1P2 | A0A6H0H1P2_BACIU | 51  | FVSISSEDVLDNKKVGLSIDDPSLLLLREAKKNAKTIVLMYRLTEGVRSADIA-----    | 102 |
| A0A061P351 | A0A061P351_9BACL | 51  | FVEINGPDDVLKKYGLSVNDSSVLLKKEAMKRSQTVLAYRVNEGSKAETVIGESSGGGGS  | 110 |
| A0A075R9L5 | A0A075R9L5_BRELA | 60  | VITMKGYEERVAETF-----GQIDILELAAEGGATVVGYRMTNGKSVAAASYSQE-----  | 108 |
| A0A410KN98 | A0A410KN98_9BACI | 51  | FISVSDMEDLNKKVGLNIDDKSLLLFREAKKKAQTVLLYRLNEGEPAKAEIA-----     | 102 |
| A0A410QZ71 | A0A410QZ71_9BACI | 51  | FVSISSEDVLDNKKVGLSIDDPSLLLLREAKKNAKTIVLMYRLTEGVRSADIA-----    | 102 |
| A0A518VEB0 | A0A518VEB0_BRELA | 43  | VITMKGYEERVAETF-----GHIGILELAAEGGATVVGYRMTSGNGVAASYTQS-----   | 91  |
| C0Z5G9     | C0Z5G9_BREBN     | 43  | LVKLGSFEERIAQTF-----GKVDIVELAAEGGATILAYRMTNGTATKAAYEQA-----   | 91  |
| Q18BN0     | Q18BN0_CLOD6     | 1   | -----MAIGLPSINI-----                                          | 10  |
| R4JQA6     | R4JQA6_9CAUD     | 51  | FISVSDMEDLNKKVGLNIDDKSLLLFREAKKKAQTVLLYRLNEGEPAKAEIA-----     | 102 |
| P54331     | XKDK_BACSU       | 51  | FVSISSEDVLDNKKVGLSIDDPSLLLLREAKKNAKTIVLMYRLTEGVRSADIA-----    | 102 |
|            |                  |     |                                                               |     |
| A0A0D1WNL8 | A0A0D1WNL8_ANEMI | 105 | -----SICTVEALINDGTRGNDITIVSQVNVLDTTKKIVITYVKGROVDKQQTQ        | 151 |
| A0A3M8B733 | A0A3M8B733_9BACL | 92  | -----DAIRIELALYPGLLGNDLRIVISASTSEPGKKELQVKG-PLQTEKFSF         | 137 |
| A0A5B0B6Z4 | A0A5B0B6Z4_9BACI | 103 | -----EGVKATAVYGGTKGNDIIIRINQNVLDANSFDVTTYMDESEVDKQTV          | 149 |
| A0A6H0H1P2 | A0A6H0H1P2_BACIU | 103 | -----EGVKATAVYGGTKGNDIIIRINQNVLDANSFDVTTYMDESEVDKQTV          | 149 |
| A0A061P351 | A0A061P351_9BACL | 111 | DGDDEEEGASGQSNGLRVAKFGGMKGNDIIRVSENVLDSELDVTTYLNNVAVNRQSV     | 170 |
| A0A075R9L5 | A0A075R9L5_BRELA | 109 | -----GSIAIQARYPGLVGNELQISIKDSTAEGLKKELQVKG-PIKTEKFSF          | 154 |
| A0A410KN98 | A0A410KN98_9BACI | 103 | -----ENFVVTANYGGQKGNETIQVAENVLDSTKRDVITYLGTDIVDKQVV           | 149 |
| A0A410QZ71 | A0A410QZ71_9BACI | 103 | -----EGVKATAVYGGTKGNDIIIRINQNVLDANSFDVTTYMDESEVDKQTV          | 149 |
| A0A518VEB0 | A0A518VEB0_BRELA | 92  | -----DSFTLEARYPGLVGNELQISIKESTVELGKKELQVKG-PIKTEKFSF          | 137 |
| C0Z5G9     | C0Z5G9_BREBN     | 92  | -----DAIRVELALYPGLVGNELKVTITVSTSEPGKKELQVKG-PLQTEKFSF         | 137 |
| Q18BN0     | Q18BN0_CLOD6     | 11  | -----SFKELAL-----TTVKERSARGIIAMVLKDAKALGLNEIHEKEDI            | 49  |
| R4JQA6     | R4JQA6_9CAUD     | 103 | -----ENFVVTANYGGQKGNETIQVAENVLDSTKRDVITYLGTDIVDKQVV           | 149 |
| P54331     | XKDK_BACSU       | 103 | -----EGVKATAVYGGTKGNDIIIRINQNVLDANSFDVTTYMDESEVDKQTV          | 149 |



|            |            |       |     |                           |                                       |                          |            |     |
|------------|------------|-------|-----|---------------------------|---------------------------------------|--------------------------|------------|-----|
| A0A0D1WNL8 | A0A0D1WNL8 | ANEMI | 152 | AEIESL----                | VPNEWVTFSGTGAIEA-----                 | TAGTTL                   | TGGTNGTVIN | 189 |
| A0A3M8B733 | A0A3M8B733 | 9BACL | 138 | ANADELVEKIGQSVYVRVQKL     | GDAA-----                             | IATAAETN                 | TGGTSGTVAL | 181 |
| A0A5B0B6Z4 | A0A5B0B6Z4 | 9BACI | 150 | KKAEEL----                | TANGYVTFGTGDLSSSTIPLTGSEGD            | TAAETLNASAGIR            | SGGTDKAPVN | 205 |
| A0A6H0H1P2 | A0A6H0H1P2 | BACIU | 150 | KKAEEL----                | TANGYVTFGTGDLSSSTIPLTGSEGD            | TAAETLNASAGIR            | SGGTDKAPVN | 205 |
| A0A061P351 | A0A061P351 | 9BACL | 171 | RRSSEL----                | QDNDWVSFEQSGRLQE-----                 | TAGTN                    | SGGTNSEART | 208 |
| A0A075R9L5 | A0A075R9L5 | BRELA | 155 | ANMDELVTKAEQSIYIKVKKLGDKA | -----                                 | VEETAMTA                 | SGGTSGIATL | 198 |
| A0A410KN98 | A0A410KN98 | 9BACI | 150 | KDVKDL----                | VKNKYVQFSGEGEAVI-----                 | TAGAA                    | SGGKNGVASV | 187 |
| A0A410QZ71 | A0A410QZ71 | 9BACI | 150 | KKAEEL----                | TANGYVTFGTGDLSSSTIPLTGSEGD            | TAAETLNASAGIR            | SGGTDKAPVN | 205 |
| A0A518VEB0 | A0A518VEB0 | BRELA | 138 | ANVDELVTKAEQSIYIKVKKLGDKV | -----                                 | AEETMMIS                 | EGGTSGITSL | 181 |
| C0Z5G9     | C0Z5G9     | BREBN | 138 | ADANELAAKTSQSNYVRVKKLGETA | -----                                 | VTIVPETA                 | TGAKSGTVAL | 181 |
| Q18BN0     | Q18BN0     | CLOD6 | 50  | PVDLSA----                | ENKEYINLALMGVNT-----                  | PNKL                     | VYVIEGEADI | 86  |
| R4JQA6     | R4JQA6     | 9CAUD | 150 | KDVKDL----                | VKNKYVQFSGEGEAVI-----                 | TAGAA                    | SGGKNGVASV | 187 |
| P54331     | XKDK       | BACSU | 150 | KKAEEL----                | TANGYVTFGTGDLSSSTIPLTGSEGD            | TAAETLNASAGIR            | SGGTDKAPVN | 205 |
|            |            |       |     | .                         | . : . *                               | .                        | .          |     |
| A0A0D1WNL8 | A0A0D1WNL8 | ANEMI | 190 | --ADYTD                   | FMTACETEFFDTIGFLSD-DVTLKTTFVG         | FIRRLREDEGRKVKGV         | VAGYEADY   | 246 |
| A0A3M8B733 | A0A3M8B733 | 9BACL | 182 | AAADATKLFMAVSGADFDAMYL    | PFDD-PAVQAAAKQFMSDRRTLGKKLSTL         | VIGGKAVED                |            | 240 |
| A0A5B0B6Z4 | A0A5B0B6Z4 | 9BACI | 206 | --SDYTD                   | FLAAETESFDVIALPVAEGDQLKATFAAFIKRLRD   | GGQKQVQGV                | TANYAGDY   | 263 |
| A0A6H0H1P2 | A0A6H0H1P2 | BACIU | 206 | --SDYTD                   | FLAAETESFDVIALPVAEGDQLKATFAAFIKRLRD   | GGQKQVQGV                | TANYAGDY   | 263 |
| A0A061P351 | A0A061P351 | 9BACL | 209 | --WDYTD                   | FLSAAEHVS YDTIGLPVDDQLKTTFVS          | FVKRMRDETGIKITGVLPNFDGDH |            | 266 |
| A0A075R9L5 | A0A075R9L5 | BRELA | 199 | SATDFTT                   | LENSISGVDFDAMYLPSAD-AGIQAAAKQFMVDREL  | FSKKRSTLVIGGLPEKD        |            | 257 |
| A0A410KN98 | A0A410KN98 | 9BACI | 188 | --ADYTA                   | FLAAETESFDVIALPVDNSEQLKATFASFIERLRD   | KQGRKQVQGV               | VANYAADQ   | 245 |
| A0A410QZ71 | A0A410QZ71 | 9BACI | 206 | --SDYTD                   | FLAAETESFDVIALPVAEGDQLKATFAAFIKRLRD   | GGQKQVQGV                | TANYAGDY   | 263 |
| A0A518VEB0 | A0A518VEB0 | BRELA | 182 | TANDFTT                   | LENSISGTDFDAMYLPSAD-VAIQAAAKQFMSDRREL | FSKKRSTLVIGGLKDKD        |            | 240 |
| C0Z5G9     | C0Z5G9     | BREBN | 182 | ASADSTKLFMAVSGADFDAMYL    | PFDD-SAVQAAAKQFMSDRRTQNKLLSTL         | VIGGKAADD                |            | 240 |
| Q18BN0     | Q18BN0     | CLOD6 | 87  | --QTALD                   | FL----ETKEFNLYLCPKA-VEADKTAIKNWI      | IKLRDIDKVKVAVLGKVVGNH    |            | 140 |
| R4JQA6     | R4JQA6     | 9CAUD | 188 | --ADYTA                   | FLAAETESFDVIALPVDNSEQLKATFASFIERLRD   | KQGRKQVQGV               | VANYAADQ   | 245 |
| P54331     | XKDK       | BACSU | 206 | --SDYTD                   | FLAAETESFDVIALPVAEGDQLKATFAAFIKRLRD   | GGQKQVQGV                | TANYAGDY   | 263 |
|            |            |       |     | :: . : : : : : : : *      | .                                     | .                        | .          |     |
| A0A0D1WNL8 | A0A0D1WNL8 | ANEMI | 247 | -----                     | EGIIINVKNSVKLLDGTETLTKERAVAVVAGAD     | AGASITKSN                | YQRY       | 291 |
| A0A3M8B733 | A0A3M8B733 | 9BACL | 241 | ENMEKHVERSVAQNARFVVN      | CAIAGQHNNNGNTYGSLEWAAWVAGMIRAT        | PAHESL                   | TAUVV      | 300 |
| A0A5B0B6Z4 | A0A5B0B6Z4 | 9BACI | 264 | -----                     | EGIIINVTEGVLLDGTETVTPDKATAWVAGAS      | AGATFNQSL                | TFVEY      | 308 |
| A0A6H0H1P2 | A0A6H0H1P2 | BACIU | 264 | -----                     | EGIIINVTEGVLLDGTETVTPDKATAWVAGAS      | AGATFNQSL                | TFVEY      | 308 |
| A0A061P351 | A0A061P351 | 9BACL | 267 | -----                     | EGIIINVTSSVELAER-KLNVAETVAVVAGAS      | AGATFNQSL                | TFVDY      | 310 |
| A0A075R9L5 | A0A075R9L5 | BRELA | 258 | SNMNEHVDRSAANNSRRVVN      | CAIAGQHVNGKTYGSLEWAAWLAGMIRAT         | PAHISLS                  | SAQLV      | 317 |
| A0A410KN98 | A0A410KN98 | 9BACI | 246 | -----                     | EGIIINVTSGVLLDGTETLTPAQTAWVAGAS       | AGANFNQSL                | TFVEY      | 290 |
| A0A410QZ71 | A0A410QZ71 | 9BACI | 264 | -----                     | EGIIINVTEGVLLDGTETVTPDKATAWVAGAS      | AGATFNQSL                | TFVEY      | 308 |
| A0A518VEB0 | A0A518VEB0 | BRELA | 241 | NNMNEHVQSVANNNSRRVVN      | CAIAGQHVNGKTYGSLEWAAWLAGMIRAT         | PAHISLS                  | SAQLV      | 300 |
| C0Z5G9     | C0Z5G9     | BREBN | 241 | ENMAKHIERSSVAQNARFVVN     | SAIAGQHNNNGKTYGSLEWAAWVAGMIRAT        | PAHESL                   | TAUVV      | 300 |
| Q18BN0     | Q18BN0     | CLOD6 | 141 | -----                     | EGIIINFTTEDVLVGEKKYSVDEFTSRVAGLI      | AGTPLSQSV                | TYTKL      | 185 |
| R4JQA6     | R4JQA6     | 9CAUD | 246 | -----                     | EGIIINVTSGVLLDGTETLTPAQTAWVAGAS       | AGANFNQSL                | TFVEY      | 290 |
| P54331     | XKDK       | BACSU | 264 | -----                     | EGIIINVTEGVLLDGTETVTPDKATAWVAGAS      | AGATFNQSL                | TFVEY      | 308 |
|            |            |       |     | . : *                     | .                                     | . : ** * :               | * :        |     |



|            |            |       |     |                                                                 |     |
|------------|------------|-------|-----|-----------------------------------------------------------------|-----|
| A0A0D1WNL8 | A0A0D1WNL8 | ANEMI | 292 | DGAVDIAIPRYTNSEIIEATNKGEFVFNVDG--EQVKVEYDINSLVTTGQDKNSRFKKNRV   | 349 |
| A0A3M8B733 | A0A3M8B733 | 9BACL | 301 | PL-KKAQKDWGHSIDILRAIGSGTLVATRDG--DVYIIIESAVNTLSVLGNHEREDYGGIRV  | 357 |
| A0A5B0B6Z4 | A0A5B0B6Z4 | 9BACI | 309 | EGAVDVLHRLDHDITIVERLGKGEFLFTFDARDKSVSVEKDINSLVTFTAENKKFAKNKI    | 368 |
| A0A6H0H1P2 | A0A6H0H1P2 | BACIU | 309 | EGAVDVLHRLDHDITIVERLGKGEFLFTFDARDKSVSVEKDINSLVTFTAENKKFAKNKI    | 368 |
| A0A061P351 | A0A061P351 | 9BACL | 311 | EGAIGVNEEDLDDEIKERLRNGEFLFHYPDRDRTVSVEKDINSFTSFTAENKRYFSKNLI    | 370 |
| A0A075R9L5 | A0A075R9L5 | BRELA | 318 | PM-KKAQKDWGHTIEIQNALNSGSLIAVRDG--DVYIIIESAVNTLTTLKAAEREDFGKIRV  | 374 |
| A0A410KN98 | A0A410KN98 | 9BACI | 291 | EGAVDTLERLDNDQVEYRLSQGEFLFTFDARDRTVSVEKDINSLTSFTVEKNQOMAKNKI    | 350 |
| A0A410QZ71 | A0A410QZ71 | 9BACI | 309 | EGAVDVLHRLDHDITIVERLGKGEFLFTFDARDKSVSVEKDINSLVTFTAENKKFAKNKI    | 368 |
| A0A518VEB0 | A0A518VEB0 | BRELA | 301 | PL-KKAQKDWGHTDIIQAALNSGTLIAVRDG--DVYIIIESAVNTLTTLKAAEREDFGKIRV  | 357 |
| C0Z5G9     | C0Z5G9     | BREBN | 301 | PL-KKALKDWGHTDILSAIGSGTLIAVRDG--DVYIIIESAVNTLAVLGHTHEREDYGGIRV  | 357 |
| Q18BN0     | Q18BN0     | CLOD6 | 186 | SDVVDI-PKMTKVDAESKVNKGELILIKEA--GAIRIARGVNSLTETAEGEMFQKIKI      | 242 |
| R4JQA6     | R4JQA6     | 9CAUD | 291 | EGAVDTLERLDNDQVEYRLSQGEFLFTFDARDRTVSVEKDINSLTSFTVEKNQOMAKNKI    | 350 |
| P54331     | XKDK       | BACSU | 309 | EGAVDVLHRLDHDITIVERLGKGEFLFTFDARDKSVSVEKDINSLVTFTAENKKFAKNKI    | 368 |
|            |            |       |     | . : . * : : : : : : * :                                         |     |
| A0A0D1WNL8 | A0A0D1WNL8 | ANEMI | 350 | MRTLDATHNDIKREIERNYIG-----KMNNDADGQAILKASVIGVLETLOANATQNLQ      | 403 |
| A0A3M8B733 | A0A3M8B733 | 9BACL | 358 | SMTLDQIVNDINAVGK-KYKG-----KLGNNDLGGAVFVSANAYMTVREQQGATEPGW      | 410 |
| A0A5B0B6Z4 | A0A5B0B6Z4 | 9BACI | 369 | VRVLDVAVNNDLTRELKALIKSRKSGSGSDIPASEDGLQYVKMTITQYMTTLQDAGGITGFD  | 428 |
| A0A6H0H1P2 | A0A6H0H1P2 | BACIU | 369 | VRVLDVAVNNDLTRELKALIKSRKSGSGSDIPASEDGLQYVKMTITQYMTTLQDAGGITGFD  | 428 |
| A0A061P351 | A0A061P351 | 9BACL | 371 | VRVLDVAVNNDLTRELKALIKLRKDRGQDIPGSNDGKQIIRSLITVYLNALQEGGAKNFD    | 430 |
| A0A075R9L5 | A0A075R9L5 | BRELA | 375 | SMTLDQIVNDITSVGK-KYKG-----KLGNNDIGGATFVGAVKTYLEVREAQGAIDKGW     | 427 |
| A0A410KN98 | A0A410KN98 | 9BACI | 351 | IRVLDVAVNNDLTRELKALIKLRKANGNDIPASDDGVQLVKTLLITQYLTQLQDGGSGITGFN | 410 |
| A0A410QZ71 | A0A410QZ71 | 9BACI | 369 | VRVLDVAVNNDLTRELKALIKSRKSGSGSDIPASEDGLQYVKMTITQYMTTLQDAGGITGFD  | 428 |
| A0A518VEB0 | A0A518VEB0 | BRELA | 358 | SMTLDQIVNDITSVGK-KYKG-----KLGNNDIGGATFVGAVKTYLEVREAQGAIDQGW     | 410 |
| C0Z5G9     | C0Z5G9     | BREBN | 358 | SMTLDQIVNDITSVGK-KYKG-----KLGNNDLGGAVFVSANAYMTVREQQGATDTGW      | 410 |
| Q18BN0     | Q18BN0     | CLOD6 | 243 | VDTLDTIHSDIRKVIIDDYIG-----KVTNSYDNKCLLIVATKSYLEELEKSALIES-D     | 295 |
| R4JQA6     | R4JQA6     | 9CAUD | 351 | IRVLDVAVNNDLTRELKALIKLRKANGNDIPASDDGVQLVKTLLITQYLTQLQDGGSGITGFN | 410 |
| P54331     | XKDK       | BACSU | 369 | VRVLDVAVNNDLTRELKALIKSRKSGSGSDIPASEDGLQYVKMTITQYMTTLQDAGGITGFD  | 428 |
|            |            |       |     | . ** : . * : : : : : : * :                                      |     |
| A0A0D1WNL8 | A0A0D1WNL8 | ANEMI | 404 | KDADFVIDFVLSV-----DDEVHATIIYQPVDSMEKFFFTILVR                    | 442 |
| A0A3M8B733 | A0A3M8B733 | 9BACL | 411 | TFTDK-----KNGNGDRRGFQLSAKPLDAIEYFDIDWEVL                        | 445 |
| A0A5B0B6Z4 | A0A5B0B6Z4 | 9BACI | 429 | SDEDITISMNE-D-----RDGFLIDLAVQPVDAAEKFFYNVEVN                    | 466 |
| A0A6H0H1P2 | A0A6H0H1P2 | BACIU | 429 | SDEDITISMNE-D-----RDGFLIDLAVQPVDAAEKFFYNVEVN                    | 466 |
| A0A061P351 | A0A061P351 | 9BACL | 431 | PSDDIDIVLTD-Q-----EDGFIINLGAQPVDAAEKFFYDTEVR                    | 468 |
| A0A075R9L5 | A0A075R9L5 | BRELA | 428 | IFEDK-----KNGIGDKRGFRLLAAKPLDAIEIFDIWEVL                        | 462 |
| A0A410KN98 | A0A410KN98 | 9BACI | 411 | SETDIVIGLNE-D-----RDGFIIDLAVQPVDAAEKFFYNVEVK                    | 448 |
| A0A410QZ71 | A0A410QZ71 | 9BACI | 429 | SDEDITISMNE-D-----RDGFLIDLAVQPVDAAEKFFYNVEVN                    | 466 |
| A0A518VEB0 | A0A518VEB0 | BRELA | 411 | IFEDK-----KNGIGDKRGFRLLAAKPLDAIEIFDIWEVL                        | 445 |
| C0Z5G9     | C0Z5G9     | BREBN | 411 | TFTDK-----KNGIGDRRGFLLSAKPLDAIEYFDIDWEVL                        | 445 |
| Q18BN0     | Q18BN0     | CLOD6 | 296 | STVEIDFEAQSKSYLKSQGVLSYMTLQEIKEANTGSKVFLKAKIKVLDAMEDIDLSIET-    | 354 |
| R4JQA6     | R4JQA6     | 9CAUD | 411 | SETDIVIGLNE-D-----RDGFIIDLAVQPVDAAEKFFYNVEVK                    | 448 |
| P54331     | XKDK       | BACSU | 429 | SDEDITISMNE-D-----RDGFLIDLAVQPVDAAEKFFYNVEVN                    | 466 |
|            |            |       |     | : : : : * : : :                                                 |     |

\*Highlighted dark grey color amino acids denote similarity among the aligned phage-like element PBSX protein XkdK.  
(Refer to SM Tables S8 & S9)

**Table S8. Distance matrices of identified *B/* 1821L and *B/* 1951 phage-like element PBSX protein XkdK (A0A518VEB0) with the similar proteins of other gram-positive bacteria.**

| Uniprot Accession #<br>(www.uniprot.org) | Uniprot Accession #<br>(https://www.uniprot.org) |            |            |            |            |            |            |            |            |        |        |        |        |
|------------------------------------------|--------------------------------------------------|------------|------------|------------|------------|------------|------------|------------|------------|--------|--------|--------|--------|
|                                          | A0A0D1WNL8                                       | A0A3M8B733 | A0A5B0B6Z4 | A0A6H0H1P2 | A0A061P351 | A0A075R9L5 | A0A410KN98 | A0A410QZ71 | A0A518VEB0 | C0Z5G9 | Q18BN0 | R4JQA6 | P54331 |
| A0A0D1WNL8                               |                                                  | 1.34       | 0.8        | 0.8        | 0.84       | 1.4        | 0.8        | 0.8        | 1.33       | 1.46   | 1.51   | 0.8    | 0.8    |
| A0A3M8B733                               | 1.34                                             |            | 1.44       | 1.44       | 1.43       | 0.38       | 1.4        | 1.44       | 0.36       | 0.14   | 1.64   | 1.4    | 1.44   |
| A0A5B0B6Z4                               | 0.8                                              | 1.44       |            | 0          | 0.56       | 1.52       | 0.37       | 0          | 1.45       | 1.45   | 1.49   | 0.37   | 0      |
| A0A6H0H1P2                               | 0.8                                              | 1.44       | 0          |            | 0.56       | 1.52       | 0.37       | 0          | 1.45       | 1.45   | 1.49   | 0.37   | 0      |
| A0A061P351                               | 0.84                                             | 1.43       | 0.56       | 0.56       |            | 1.42       | 0.57       | 0.56       | 1.45       | 1.38   | 1.54   | 0.57   | 0.56   |
| A0A075R9L5                               | 1.4                                              | 0.38       | 1.52       | 1.52       | 1.42       |            | 1.44       | 1.55       | 0.1        | 0.39   | 1.49   | 1.44   | 1.55   |
| A0A410KN98                               | 0.8                                              | 1.4        | 0.37       | 0.37       | 0.57       | 1.44       |            | 0.37       | 1.4        | 1.37   | 1.66   | 0      | 0.37   |
| A0A410QZ71                               | 0.8                                              | 1.44       | 0          | 0          | 0.56       | 1.55       | 0.37       |            | 1.45       | 1.45   | 1.49   | 0.37   | 0      |
| A0A518VEB0                               | 1.33                                             | 0.36       | 1.45       | 1.45       | 1.45       | 0.1        | 1.4        | 1.45       |            | 0.39   | 1.52   | 1.4    | 1.45   |
| C0Z5G9                                   | 1.46                                             | 0.14       | 1.45       | 1.45       | 1.38       | 0.39       | 1.37       | 1.45       | 0.39       |        | 1.66   | 1.37   | 1.45   |
| Q18BN0                                   | 1.51                                             | 1.64       | 1.49       | 1.49       | 1.54       | 1.49       | 1.66       | 1.49       | 1.52       | 1.66   |        | 1.66   | 1.49   |
| R4JQA6                                   | 0.8                                              | 1.4        | 0.37       | 0.37       | 0.57       | 1.44       | 0          | 0.37       | 1.4        | 1.37   | 1.66   |        | 0.37   |
| P54331                                   | 0.8                                              | 1.44       | 0          | 0          | 0.56       | 1.55       | 0.37       | 0          | 1.45       | 1.45   | 1.49   | 0.37   |        |

**Table S9. Amino acids alignment % of identified *B/* 1821L and *B/* 1951 phage-like element PBSX protein XkdK (A0A518VEB0) with the similar proteins of other gram-positive bacteria.**

| Uniprot Accession #<br>(www.uniprot.org) | Uniprot Accession #<br>(https://www.uniprot.org) |            |            |            |            |            |            |            |            |        |        |        |        |
|------------------------------------------|--------------------------------------------------|------------|------------|------------|------------|------------|------------|------------|------------|--------|--------|--------|--------|
|                                          | A0A0D1WNL8                                       | A0A3M8B733 | A0A5B0B6Z4 | A0A6H0H1P2 | A0A0G1P351 | A0A075R9L5 | A0A410KN98 | A0A410QZ71 | A0A518VEB0 | C0Z5G9 | Q18BN0 | R4JQA6 | P54331 |
| A0A0D1WNL8                               |                                                  | 23.9       | 41.5       | 41.5       | 39.8       | 22.0       | 42.6       | 41.5       | 22.7       | 23.2   | 22.0   | 42.6   | 41.5   |
| A0A3M8B733                               | 23.9                                             |            | 21.2       | 21.2       | 20.7       | 68.2       | 20.6       | 21.2       | 69.0       | 86.0   | 18.4   | 20.6   | 21.2   |
| A0A5B0B6Z4                               | 41.5                                             | 21.2       |            | 100.0      | 51.8       | 20.3       | 64.8       | 100.0      | 21.2       | 20.5   | 22.4   | 64.8   | 100.0  |
| A0A6H0H1P2                               | 41.5                                             | 21.2       | 100.0      |            | 51.8       | 20.3       | 64.8       | 100.0      | 21.2       | 20.5   | 22.4   | 64.8   | 100.0  |
| A0A0G1P351                               | 39.8                                             | 20.7       | 51.8       | 51.8       |            | 19.0       | 53.4       | 51.8       | 18.8       | 19.4   | 20.5   | 53.4   | 51.8   |
| A0A075R9L5                               | 22.0                                             | 68.2       | 20.3       | 20.3       | 19.0       |            | 19.8       | 20.3       | 89.1       | 67.4   | 19.3   | 19.8   | 20.3   |
| A0A410KN98                               | 42.6                                             | 20.6       | 64.8       | 64.8       | 53.4       | 19.8       |            | 64.8       | 20.3       | 22.0   | 20.1   | 100.0  | 64.8   |
| A0A410QZ71                               | 41.5                                             | 21.2       | 100.0      | 100.0      | 51.8       | 20.3       | 64.8       |            | 21.2       | 20.5   | 22.4   | 64.8   | 100.0  |
| A0A518VEB0                               | 22.7                                             | 69.0       | 21.2       | 21.2       | 18.8       | 89.1       | 20.3       | 21.2       |            | 68.1   | 19.9   | 20.3   | 21.2   |
| C0Z5G9                                   | 23.2                                             | 86.0       | 20.5       | 20.5       | 19.4       | 67.4       | 22.0       | 20.5       | 68.1       |        | 20.2   | 22.0   | 20.5   |
| Q18BN0                                   | 22.0                                             | 18.4       | 22.4       | 22.4       | 20.5       | 19.3       | 20.1       | 22.4       | 19.9       | 20.2   |        | 20.1   | 22.4   |
| R4JQA6                                   | 42.6                                             | 20.6       | 64.8       | 64.8       | 53.4       | 19.8       | 100.0      | 64.8       | 20.3       | 22.0   | 20.1   |        | 64.8   |
| P54331                                   | 41.5                                             | 21.2       | 100.0      | 100.0      | 51.8       | 20.3       | 64.8       | 100.0      | 21.2       | 20.5   | 22.4   | 64.8   |        |



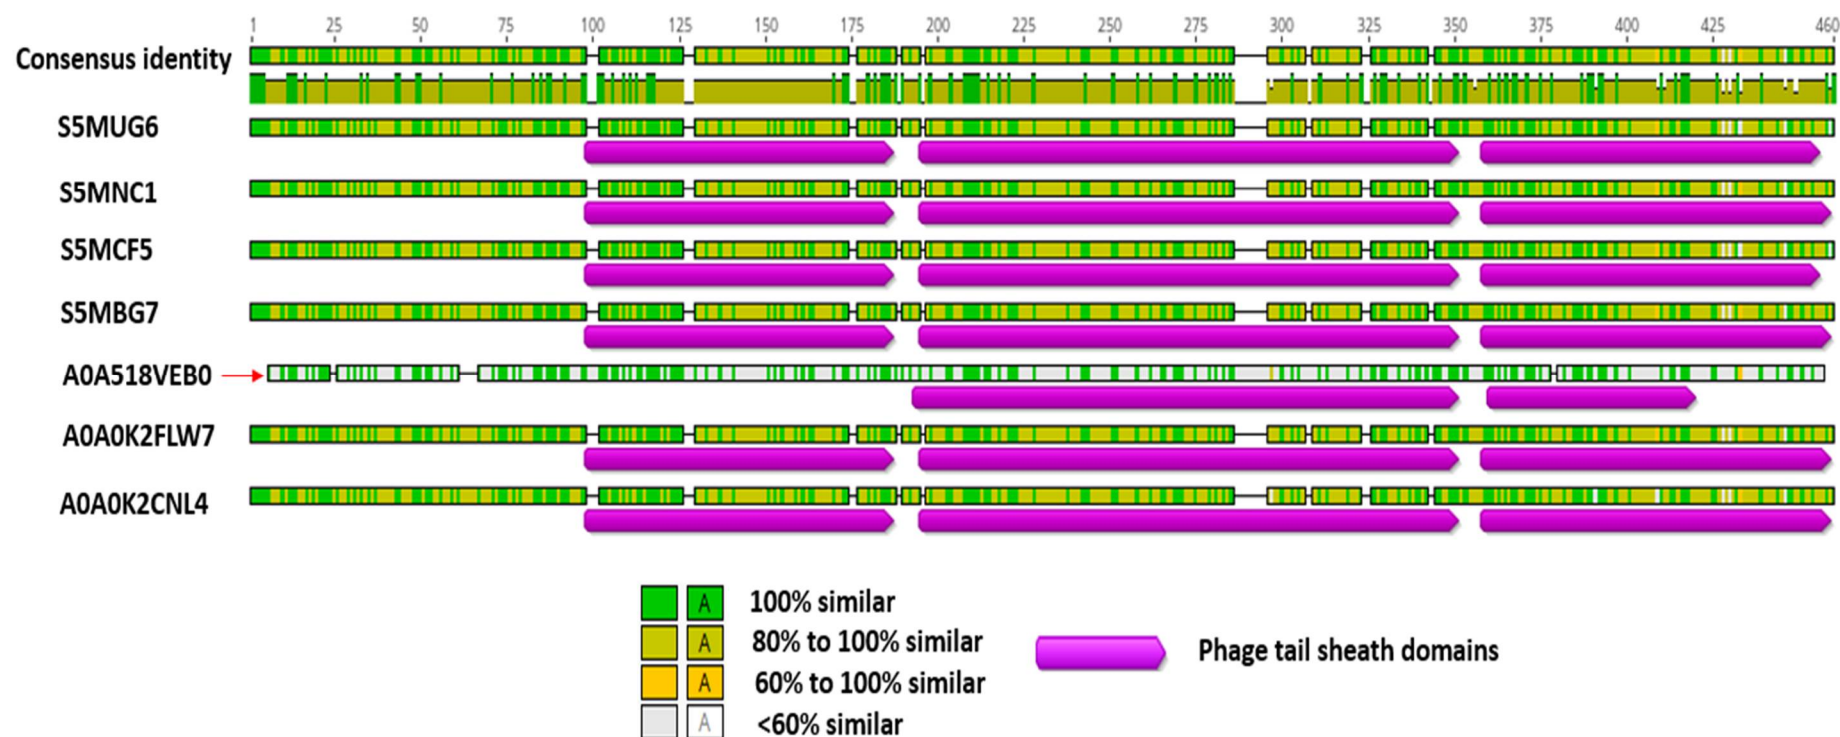

Figure S11. Amino acids alignment and percentage identity of identified putative phage tail-sheath protein (A0A518VEB0, shown with red arrow) of *Bl* 1821L and *Bl* 1951 with similar proteins of different *Bl* phages including Abouo (S5MUG6), Jimmer1 (S5MNC1), Davies (S5MCF5), Jimmer2, (S5MBG7), Powder (A0A0K2FLW7), and Osiris (A0A0K2CNL4) using Geneious basic.

(Refer to SM Figure S12 & Tables S10 and S11)

Figure S12. Amino acids alignment of identified *Bf* 1821L and *Bf* 1951 putative phage tail-sheath protein (A0A518VEB0) with the phage tail-sheath protein of different *Bf* phages using the programme CLUSTALO.

|            |                  |     |                                                                 |     |
|------------|------------------|-----|-----------------------------------------------------------------|-----|
| A0A518VEB0 | A0A518VEB0 BRELA | 1   | -----MTIQEREPGVNVELKAKA-QERVLPKSGVVLVPYLAEWGAPDQVITMKGYEERVA    | 54  |
| S5MUG6     | S5MUG6_9CAUD     | 1   | MMQNWIAQNKVRPGTYVNVVSEAKPQGAISERGTVTMALSLSWGSPSGEVIEIQAGENTLD   | 60  |
| S5MNC1     | S5MNC1_9CAUD     | 1   | MMQNWIAQNKVRPGTYVNVVSEAKPQGAISERGTVTMALSLSWGSPSGEVIEIQAGENTLD   | 60  |
| S5MCF5     | S5MCF5_9CAUD     | 1   | MMQNWIAQNKVRPGTYVNVVSEAKPQGAISERGTVTMALSLSWGSPSGEVIEIQAGENTLD   | 60  |
| S5MBG7     | S5MBG7_9CAUD     | 1   | MMQNWIAQNKVRPGTYVNVVSEAKPQGAISERGTVTMALSLSWGSPSGEVIEIQAGENTLD   | 60  |
| A0A0K2FLW7 | A0A0K2FLW7_9CAUD | 1   | MMQNWIAQNKVRPGTYVNVVSEAKPQGAISERGTVTMALSLSWGSPSGEVIEIQAGENTLD   | 60  |
| A0A0K2CNL4 | A0A0K2CNL4_9CAUD | 1   | MMQNWIAQNKVRPGTYVNVVSEAKPQGAISERGTVTMALSLSWGSPSGEVIEIQAGENTLD   | 60  |
|            |                  |     | :: :: ** . * :: :: * : . : : * . * : . ** . : ** :: . * : :     |     |
| A0A518VEB0 | A0A518VEB0 BRELA | 55  | ETF-----GHIGILELAEGGATVLGYRMTSGNGVAASYTQSDSFTLEARYPGILVGNLQ     | 109 |
| S5MUG6     | S5MUG6_9CAUD     | 61  | KLGYDISEPQILLVQEAALKRAKTLILLYRLNTGSKAQ---ASSDNLTVTALYGGVRGNDIT  | 117 |
| S5MNC1     | S5MNC1_9CAUD     | 61  | KLGYDISEPQILLVQEAALKRAKTLILLYRLNTGSKAQ---ASSDNLTVTALYGGVRGNDIT  | 117 |
| S5MCF5     | S5MCF5_9CAUD     | 61  | KLGYDISEPQILLVQEAALKRAKTLILLYRLNTGSKAQ---ASSDNLTVTALYGGVRGNDIT  | 117 |
| S5MBG7     | S5MBG7_9CAUD     | 61  | KLGYDISEPQILLVQEAALKRAKTLILLYRLNTGSKAQ---ASSDNLTVTALYGGVRGNDIT  | 117 |
| A0A0K2FLW7 | A0A0K2FLW7_9CAUD | 61  | KLGYDISEPQILLVQEAALKRAKTLILLYRLNTGSKAQ---ASSDNLTVTALYGGVRGNDIT  | 117 |
| A0A0K2CNL4 | A0A0K2CNL4_9CAUD | 61  | KLGYDISEPQILLVQEAALKRAKTLILLYRLNTGSKAQ---ASSDNLTVTALYGGVRGNDIT  | 117 |
|            |                  |     | : : * : : * : . * * * * : : : . : * * * : * * * : * * :         |     |
| A0A518VEB0 | A0A518VEB0 BRELA | 110 | TSIKESTVELGKK--ELQVKGPIKTEKFSFANVDELVTKAEQSIYIKVKKLGDKVAEETM    | 167 |
| S5MUG6     | S5MUG6_9CAUD     | 118 | VVVEQNIDDETTFIVKTLVAGSIVDNQLA-----KKIEDLKANKFVTFSGTGALV--ASA    | 170 |
| S5MNC1     | S5MNC1_9CAUD     | 118 | VVVEQNIDDETTFIVKTLVAGSIVDNQLA-----KKIEDLKANKFVTFSGTGALV--ASA    | 170 |
| S5MCF5     | S5MCF5_9CAUD     | 118 | VVVEQNIDDETTFIVKTLVAGSIVDNQLA-----KKIEDLKANKFVTFSGTGALV--ASA    | 170 |
| S5MBG7     | S5MBG7_9CAUD     | 118 | VVVEQNIDDETTFIVKTLVAGSIVDNQLA-----KKIEDLKANKFVTFSGTGALV--ASA    | 170 |
| A0A0K2FLW7 | A0A0K2FLW7_9CAUD | 118 | VVVEQNIDDETTFIVKTLVAGSIVDNQLA-----KKIEDLKANKFVTFSGTGALV--ASA    | 170 |
| A0A0K2CNL4 | A0A0K2CNL4_9CAUD | 118 | VVVEQNIDDETTFIVKTLVAGSIVDNQLA-----KKIEDLKANKFVTFSGTGALV--ASA    | 170 |
|            |                  |     | : : : : . : . : * * * : : : : : : . : . : : . : : : * * :       |     |
| A0A518VEB0 | A0A518VEB0 BRELA | 168 | MTSLLEGGTSGITSLTANDETTTLFNSISGTDFFDAMYLPSADVAIQAAAKQFMSDRELFSSK | 227 |
| S5MUG6     | S5MUG6_9CAUD     | 171 | GIPITGGTIDGTEIG--VNHTAYREAEELHDFDAMAVPYDDPTIKSVYVAFKRLANQONR    | 228 |
| S5MNC1     | S5MNC1_9CAUD     | 171 | GIPITGGTIDGTEIG--VNHTAYREAEELHDFDAMAVPYDDPTIKSVYVAFKRLANQONR    | 228 |
| S5MCF5     | S5MCF5_9CAUD     | 171 | GIPITGGTIDGTEIG--VNHTAYREAEELHDFDAMAVPYDDPTIKSVYVAFKRLANQONR    | 228 |
| S5MBG7     | S5MBG7_9CAUD     | 171 | GIPITGGTIDGTEIG--VNHTAYREAEELHDFDAMAVPYDDPTIKSVYVAFKRLANQONR    | 228 |
| A0A0K2FLW7 | A0A0K2FLW7_9CAUD | 171 | GIPITGGTIDGTEIG--VNHTAYREAEELHDFDAMAVPYDDPTIKSVYVAFKRLANQONR    | 228 |
| A0A0K2CNL4 | A0A0K2CNL4_9CAUD | 171 | GIPITGGTIDGTEIG--VNHTAYREAEELHDFDAMAVPYDDPTIKSVYVAFKRLANQONR    | 228 |
|            |                  |     | * * * * * . * : : : : : * * * * * : * * : : : . * . : : :       |     |



|            |                  |     |                                                               |     |
|------------|------------------|-----|---------------------------------------------------------------|-----|
| A0A518VEB0 | A0A518VEB0 BRELA | 228 | RSTLVIGGLKDKNNMNEHVQSVANNRRVVNCAIAGQHVNGKTYGSLEWAAWLAGMIA     | 287 |
| S5MUG6     | S5MUG6_9CAUD     | 229 | FIQIVVPNYAQADDPT-----VISVSNVGVILSNSTVIDAVKATAWVAGATA          | 274 |
| S5MNC1     | S5MNC1_9CAUD     | 229 | FIQIVVPNYAQADDPT-----VISVSNVGVILSNSTVIDAVKATAWVAGATA          | 274 |
| S5MCF5     | S5MCF5_9CAUD     | 229 | FIQIVVPNYAQADDPT-----VISVSNVGVILSNSTVIDAVKATAWVAGATA          | 274 |
| S5MBG7     | S5MBG7_9CAUD     | 229 | FIQIVVPNYAQADDPT-----VISVSNVGVILSNSTVIDAVKATAWVAGATA          | 274 |
| A0A0K2FLW7 | A0A0K2FLW7_9CAUD | 229 | FIQIVVPNYAQADDPT-----VISVSNVGVILSNSTVIDAVKATAWVAGATA          | 274 |
| A0A0K2CNL4 | A0A0K2CNL4_9CAUD | 229 | FIQIVVPNYAQADDPT-----VISVSNVGVILSNSTVIDAVKATAWVAGATA          | 274 |
|            |                  |     | ::: . : *:                                                    |     |
| A0A518VEB0 | A0A518VEB0 BRELA | 288 | ATPAHISLSAQVLVPL-KKAEKDWGHTDIQAALNSGTLIAVRDGDVYLIESAVNTLTTLKA | 346 |
| S5MUG6     | S5MUG6_9CAUD     | 275 | GANVNQSLTHTAYDDAVAVHGRNLDSQITKALLNGEFLFELHNGKVVEQDINTFTSFSP   | 334 |
| S5MNC1     | S5MNC1_9CAUD     | 275 | GANVNQSLTHTAYDDAVAVHGRNLDSQITKALLNGEFLFELHNGKVVEQDINTFTSFSP   | 334 |
| S5MCF5     | S5MCF5_9CAUD     | 275 | GANVNQSLTHTAYDDAVAVHGRNLDSQITKALLNGEFLFELHNGKVVEQDINTFTSFSP   | 334 |
| S5MBG7     | S5MBG7_9CAUD     | 275 | GANVNQSLTHTAYDDAVAVHGRNLDSQITKALLNGEFLFELHNGKVVEQDINTFTSFSP   | 334 |
| A0A0K2FLW7 | A0A0K2FLW7_9CAUD | 275 | GANVNQSLTHTAYDDAVAVHGRNLDSQITKALLNGEFLFELHNGKVVEQDINTFTSFSP   | 334 |
| A0A0K2CNL4 | A0A0K2CNL4_9CAUD | 275 | GANVNQSLTHTAYDDAVAVHGRNLDSQITKALLNGEFLFELHNGKVVEQDINTFTSFSP   | 334 |
|            |                  |     | ::: **:                                                       |     |
| A0A518VEB0 | A0A518VEB0 BRELA | 347 | AEREDFGKIRVSMITLDQIVNDIT-SVGKKYKGLDNDIGGATFVGAVKTYLEVREAQGA   | 405 |
| S5MUG6     | S5MUG6_9CAUD     | 335 | DKRKHESKNRVVRTINGITKDWKLAFFDEQYLGKGDNDADGRNLYKKECIKISEQYQAMGA | 394 |
| S5MNC1     | S5MNC1_9CAUD     | 335 | DKRKHESKNRVVRTINGITKDWKLAFFDEQYLGKGDNDADGRNLYKKECIKISEQYQAMGA | 394 |
| S5MCF5     | S5MCF5_9CAUD     | 335 | DKRKHESKNRVVRTINGITKDWKLAFFDEQYLGKGDNDADGRNLYKKECIKISEQYQAMGA | 394 |
| S5MBG7     | S5MBG7_9CAUD     | 335 | DKRKHESKNRVVRTINGITKDWKLAFFDEQYLGKGDNDADGRNLYKKECIKISEQYQAMGA | 394 |
| A0A0K2FLW7 | A0A0K2FLW7_9CAUD | 335 | DKRKHESKNRVVRTINGITKDWKLAFFDEQYLGKGDNDADGRNLYKKECIKISEQYQAMGA | 394 |
| A0A0K2CNL4 | A0A0K2CNL4_9CAUD | 335 | DKRKHESKNRVVRTINGITKDWKLAFFDEQYLGKYDNDADGRNLYKKECIKIVEEYQAMGA | 394 |
|            |                  |     | :::.* ** *::: *::: . :::: * * *::: * : . * : * **             |     |
| A0A518VEB0 | A0A518VEB0 BRELA | 406 | IDQGWIFEDKKN---GIGDKRGFRLAAPLDAIEIFDIEWEVL---                 | 445 |
| S5MUG6     | S5MUG6_9CAUD     | 395 | IQN---FDAQKDIAVLPGEDSDSLLTEGYIQAVDSMEKNYLKAVAR                | 437 |
| S5MNC1     | S5MNC1_9CAUD     | 395 | IQN---FDAQKDIIIVSPGNDSDSLLTEGYIQPVDAMEKNYLKAVVR               | 437 |
| S5MCF5     | S5MCF5_9CAUD     | 395 | IQN---FDAQKDIAVLPGEDSDSLLTEGYIQAVDSMEKNYLKAVAR                | 437 |
| S5MBG7     | S5MBG7_9CAUD     | 395 | IQN---FDAQKDIIIVSPGNDSDSLLTEGYIQPVDAMEKNYLKAVVR               | 437 |
| A0A0K2FLW7 | A0A0K2FLW7_9CAUD | 395 | IQN---FDAQKDIIIVSPGNDSDSLLTEGYIQPVDAMEKNYLKAVVR               | 437 |
| A0A0K2CNL4 | A0A0K2CNL4_9CAUD | 395 | IQN---FDAQKDIIIVSPGNDSDSLLTEGYIQPVDAMEKNYLKAVVR               | 437 |
|            |                  |     | *:: *:: *:: *:: . *:: : : : : : :                             |     |

\*Highlighted dark grey color amino acids denote similarity among the aligned phage tail-sheath like proteins.  
(Refer to SM Tables S10 & S11)

**Table S10. Distance matrices of identified *B/* 1821L and *B/* 1951 putative phage tail-sheath protein (A0A518VEB0) with the phage tail-sheath proteins of different *B/* phages .**

| Uniprot Accession #<br>( <a href="https://www.uniprot.org">https://www.uniprot.org</a> ) | Uniprot Accession #<br>( <a href="https://www.uniprot.org">https://www.uniprot.org</a> ) |        |        |        |            |            |            |
|------------------------------------------------------------------------------------------|------------------------------------------------------------------------------------------|--------|--------|--------|------------|------------|------------|
|                                                                                          | S5MUG6                                                                                   | S5MNC1 | S5MCF5 | S5MBG7 | A0A518VEB0 | A0A0K2FLW7 | A0A0K2CNL4 |
| S5MUG6                                                                                   |                                                                                          | 0.01   | 0      | 0.01   | 1.56       | 0.01       | 0.03       |
| S5MNC1                                                                                   | 0.01                                                                                     |        | 0.01   | 0      | 1.51       | 0          | 0.01       |
| S5MCF5                                                                                   | 0                                                                                        | 0.01   |        | 0.01   | 1.56       | 0.01       | 0.03       |
| S5MBG7                                                                                   | 0.01                                                                                     | 0      | 0.01   |        | 1.51       | 0          | 0.01       |
| A0A518VEB0                                                                               | 1.56                                                                                     | 1.51   | 1.56   | 1.51   |            | 1.51       | 1.52       |
| A0A0K2FLW7                                                                               | 0.01                                                                                     | 0      | 0.01   | 0      | 1.51       |            | 0.01       |
| A0A0K2CNL4                                                                               | 0.03                                                                                     | 0.01   | 0.03   | 0.01   | 1.52       | 0.01       |            |

**Table S11. Amino acids alignment (%) of identified *B/* 1821L and *B/* 1951 putative phage tail-sheath protein (A0A518VEB0) with the phage tail-sheath proteins of different *B/* phages.**

| Uniprot Accession #<br>( <a href="https://www.uniprot.org">https://www.uniprot.org</a> ) | Uniprot Accession #<br>( <a href="https://www.uniprot.org">https://www.uniprot.org</a> ) |        |        |        |            |            |            |
|------------------------------------------------------------------------------------------|------------------------------------------------------------------------------------------|--------|--------|--------|------------|------------|------------|
|                                                                                          | S5MUG6                                                                                   | S5MNC1 | S5MCF5 | S5MBG7 | A0A518VEB0 | A0A0K2FLW7 | A0A0K2CNL4 |
| S5MUG6                                                                                   |                                                                                          | 98.6   | 100    | 98.6   | 21.9       | 98.6       | 97.5       |
| S5MNC1                                                                                   | 98.6                                                                                     |        | 98.6   | 100    | 21.7       | 100        | 98.9       |
| S5MCF5                                                                                   | 100                                                                                      | 98.6   |        | 98.6   | 21.9       | 98.6       | 97.5       |
| S5MBG7                                                                                   | 98.6                                                                                     | 100    | 98.6   |        | 21.7       | 100        | 98.9       |
| A0A518VEB0                                                                               | 21.9                                                                                     | 21.7   | 21.9   | 21.8   |            | 21.7       | 21.7       |
| A0A0K2FLW7                                                                               | 98.6                                                                                     | 100    | 98.6   | 100    | 21.7       |            | 98.7       |
| A0A0K2CNL4                                                                               | 97.5                                                                                     | 98.9   | 97.5   | 98.9   | 21.7       | 98.9       |            |

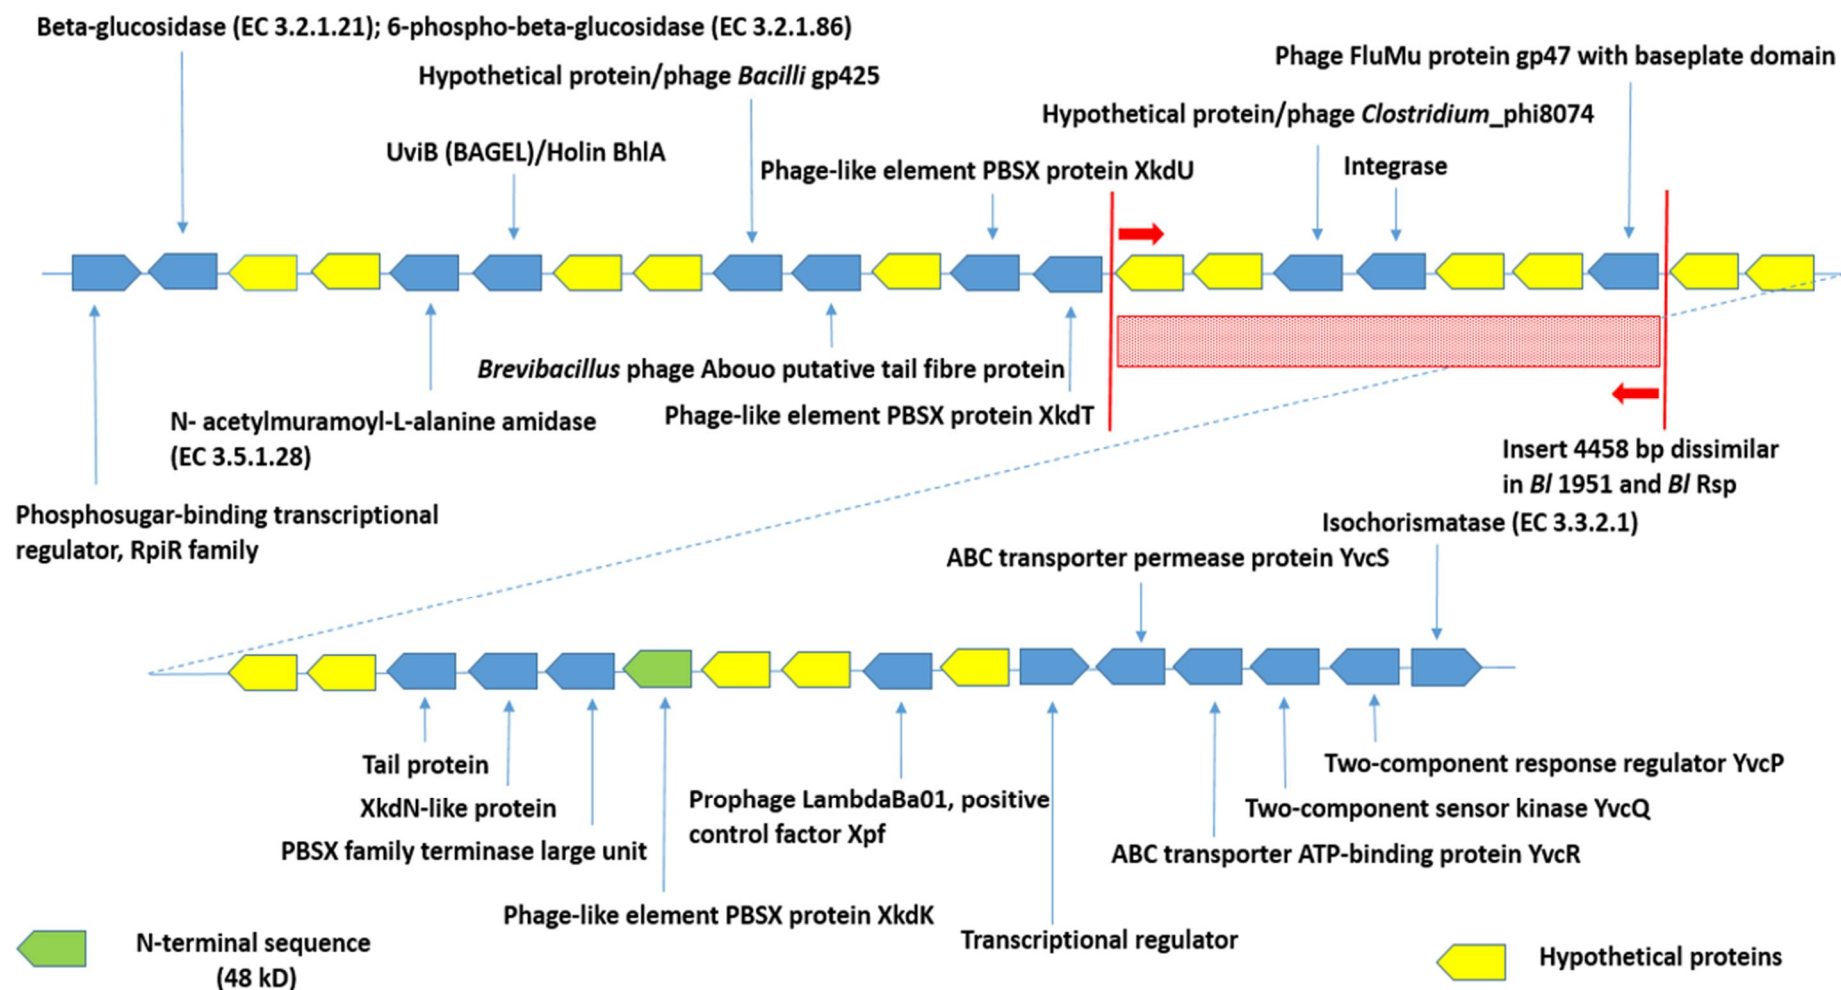

Figure S13. Schematic of the genomic architecture of *B/ 1821L* PBSX-like region encoding the identified gene *xkdK*. The red shaded box denotes *B/ 1951* region absent in *B/ 1821L*.

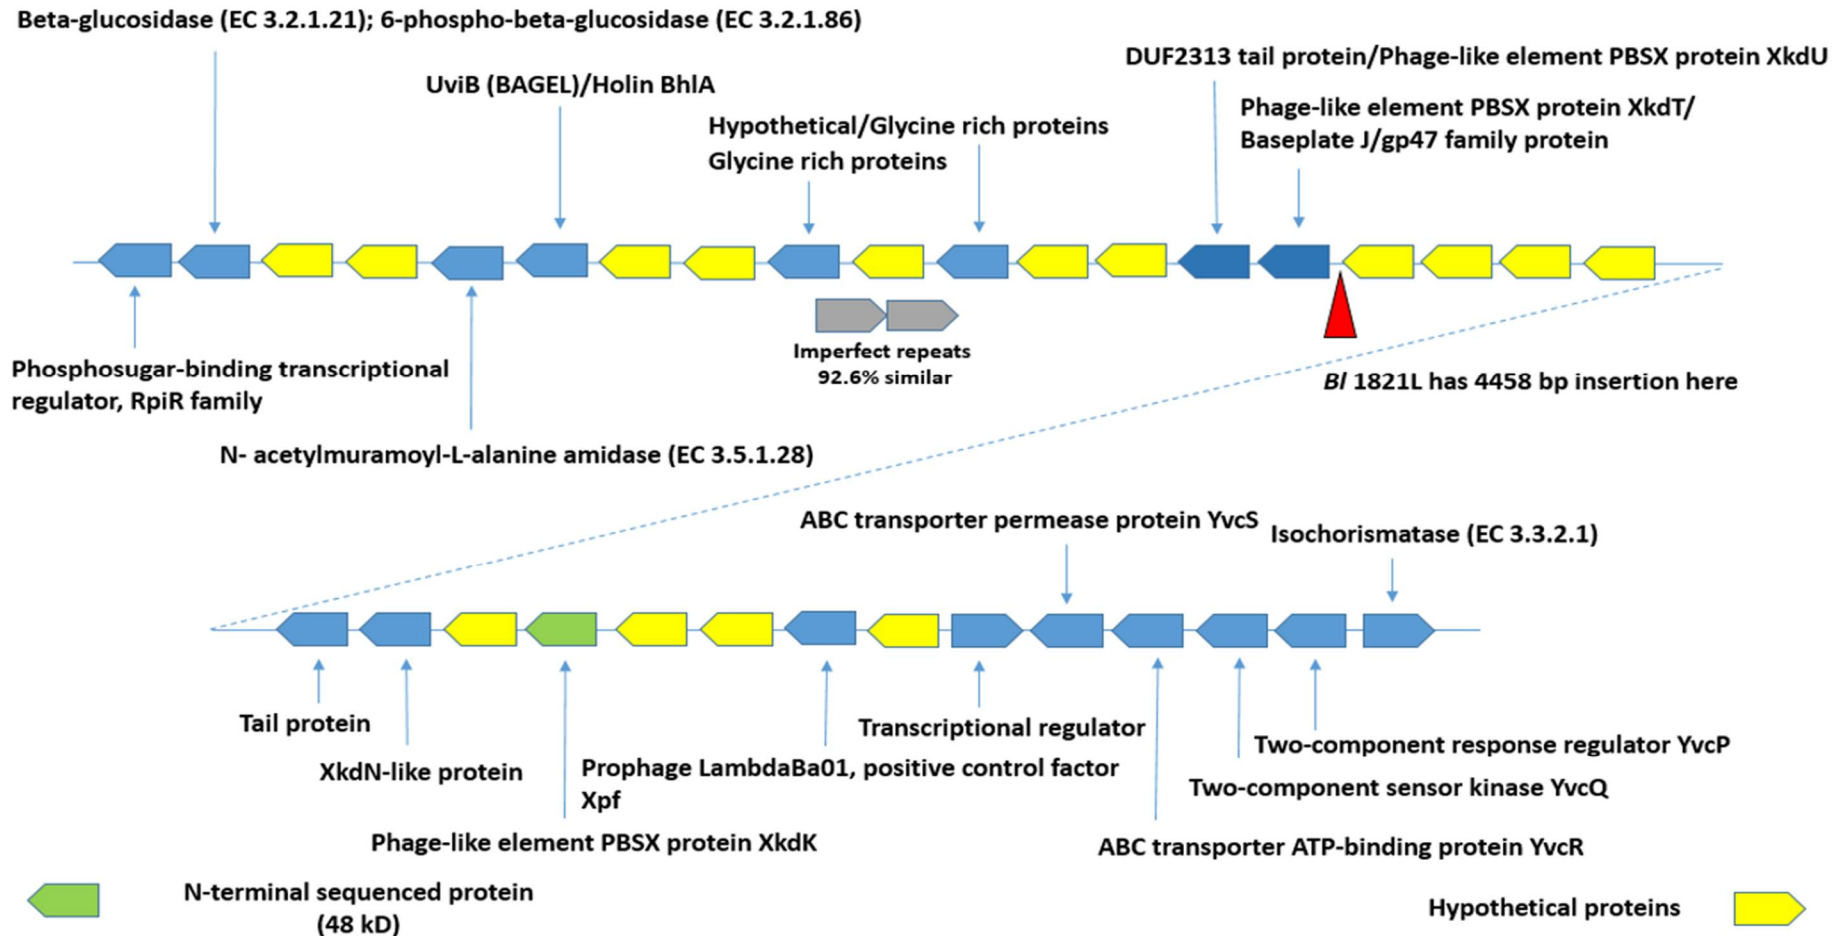

Figure S14. Genomic architecture of *B/ 1951* PBSX-like region encoding the identified gene *xkdK*. The filled red wedge points to the integration of the red shaded region of *B/ 1821L* (Figure 13) in the *B/ 1951* genome.



**Table S12. Protein orthologues of *B/* 1821L UviB (BAGEL)/Holin BhIA protein in Uniprot.**

| Accession  | Homologous protein      | Organism                                       | % identity |
|------------|-------------------------|------------------------------------------------|------------|
| A0A075R9K7 | Uncharacterised protein | <i>Brevibacillus laterosporus</i><br>LMG 15441 | 100        |
| S5M5U3     | Bacteriocin UviB        | <i>Brevibacillus</i> phage Emery               | 92.0       |
| S5M6A1     | Uncharacterised protein | <i>Brevibacillus</i> phage Davies              | 90.8       |
| S5MNE1     | Uncharacterised protein | <i>Brevibacillus</i> phage Jimmer 1            | 90.8       |
| A0A0K2CND1 | Uncharacterised protein | <i>Brevibacillus</i> phage Osiris 1            | 90.8       |

**Figure S15. Amino acids alignment of identified *B/1821L* and *B/1951* phage-like element PBSX protein XkdK (A0A518VEB0) with the similar proteins of the defective prophages PBSZ, PBSX, and PBP180 using programme CLUSTALO.**

|            |                  |     |                                                                |     |
|------------|------------------|-----|----------------------------------------------------------------|-----|
| P54331     | XKDK_BACSU       | 279 | TEVTPDKATAWVAGASAGATFNQSLT--FVEYEGAVDVLHRLDHTIVERLIGKGEFLFTF   | 336 |
| AOA518VEB0 | AOA518VEB0_BRELA | 271 | KTYGSLEWAAWLAGMIPATPAHISLSAQLVPLKKA---EKDWGHTDIQAALNSGTLLIAVR  | 327 |
| R4JQA6     | R4JQA6_9CAUD     | 261 | TELTPAQTAWVAGASAGANFNQSLT--FVEYEGAVDTLERLDNDQVEYRLSQGEFLFTF    | 318 |
| EOU1S9     | EOU1S9_BACPZ     | 279 | TEVTPDKATAWVAGASAGATFNQSLT--FVEYEGAVDVLHRLDHTIVERLIGKGEFLFTF   | 336 |
|            |                  |     | . : **: ** *: : **: : * : * . . : : *..* : : .                 |     |
| P54331     | XKDK_BACSU       | 337 | DARDKSVSVEKDINSLVTFETAEKNKKFAKNKIVRVLDVAVNNDLTRELKALIKSRKSGSD  | 396 |
| AOA518VEB0 | AOA518VEB0_BRELA | 328 | D--GDVYLIESAVNTLTTLKAAEREDFGKIRVSMITLDQIVNDITSVGKKYKKGK--LDNND | 383 |
| R4JQA6     | R4JQA6_9CAUD     | 319 | DARDRTVSVEKDINSLSFTVEKNQOMAKNKIIRVLDVINNDLTFELKNLIKLRKANGND    | 378 |
| EOU1S9     | EOU1S9_BACPZ     | 337 | DARDKSVSVEKDINSLVTFETAEKNKKFAKNKIVRVLDVAVNNDLTRELKALIKSRKSGSD  | 396 |
|            |                  |     | * . :*. :*: ..... :*: : : : .** : **: * ...*                   |     |
| P54331     | XKDK_BACSU       | 397 | IPASEDGLQYVKTMITQYMTTLQDAGGIT-GFDSDEDITISMNEDRDGFLIDLAVQPVDA   | 455 |
| AOA518VEB0 | AOA518VEB0_BRELA | 384 | I----GGATFVG-AVKTYLEVREAQGAIDQGI-FEDKKNGI-GDKRG--FRLAAKPLDA    | 434 |
| R4JQA6     | R4JQA6_9CAUD     | 379 | IPASDDGVQLVKTLITQYLTQLQDGGGIT-GFNSETDIVIGLNEDRDGFIIDLAVQPVDA   | 437 |
| EOU1S9     | EOU1S9_BACPZ     | 397 | IPASEDGLQYVKTMITQYMTTLQDAGGIT-GFDSDEDITISMNEDRDGFLIDLAVQPVDA   | 455 |
|            |                  |     | * . * * :. * : : ..* *: * .: *: * : **.:**                     |     |
| P54331     | XKDK_BACSU       | 456 | AEKEYFNVEVN                                                    | 466 |
| AOA518VEB0 | AOA518VEB0_BRELA | 435 | IEIEDIEWEVL                                                    | 445 |
| R4JQA6     | R4JQA6_9CAUD     | 438 | AEKEYFNVEVK                                                    | 448 |
| EOU1S9     | EOU1S9_BACPZ     | 456 | AEKEYFNVEVN                                                    | 466 |
|            |                  |     | * * : : **                                                     |     |

\*Highlighted dark grey color amino acids denote similarity among the aligned phage-like element PBSX protein XkdK.  
(Refer to SM Tables S13 & S14)

**Table S13. Distance matrices of identified *B/* 1821L and *B/* 1951 phage-like element PBSX protein XkdK (A0A518VEB0) with the similar proteins of the defective prophages PBSZ, PBSX, and PBP180.**

| Uniprot Accession #<br>( <a href="https://www.uniprot.org">https://www.uniprot.org</a> ) | Uniprot Accession #<br>( <a href="https://www.uniprot.org">https://www.uniprot.org</a> ) |            |        |        |
|------------------------------------------------------------------------------------------|------------------------------------------------------------------------------------------|------------|--------|--------|
|                                                                                          | P54331                                                                                   | A0A518VEB0 | R4JQA6 | E0U1S9 |
| P54331                                                                                   |                                                                                          | 1.45       | 0.37   | 0.01   |
| A0A518VEB0                                                                               | 1.45                                                                                     |            | 1.40   | 1.47   |
| R4JQA6                                                                                   | 0.37                                                                                     | 1.40       |        | 0.37   |
| E0U1S9                                                                                   | 0.01                                                                                     | 1.47       | 0.37   |        |

(Refer to SM Figure S15)

**Table S14. Amino acids alignment (%) of identified *B/* 1821L and *B/* 1951 phage-like element PBSX protein XkdK (A0A518VEB0) with the similar proteins of the defective prophages PBSZ, PBSX, and PBP180.**

| Uniprot Accession #<br>( <a href="https://www.uniprot.org">https://www.uniprot.org</a> ) | Uniprot Accession #<br>( <a href="https://www.uniprot.org">https://www.uniprot.org</a> ) |            |        |        |
|------------------------------------------------------------------------------------------|------------------------------------------------------------------------------------------|------------|--------|--------|
|                                                                                          | P54331                                                                                   | A0A518VEB0 | R4JQA6 | E0U1S9 |
| P54331                                                                                   |                                                                                          | 22.9       | 66.5   | 98.7   |
| A0A518VEB0                                                                               | 22.9                                                                                     |            | 21.6   | 22.9   |
| R4JQA6                                                                                   | 66.5                                                                                     | 21.6       |        | 66.5   |
| E0U1S9                                                                                   | 98.7                                                                                     | 22.9       | 66.5   |        |

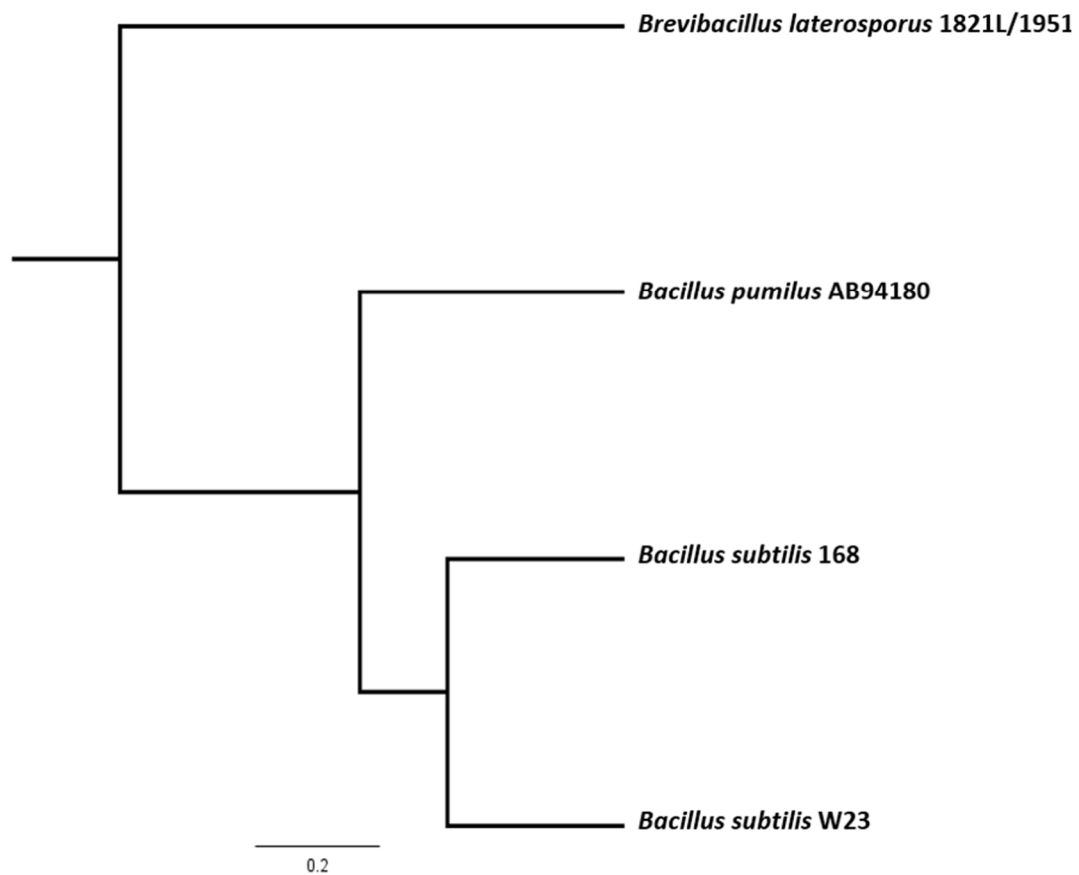

**Figure S16. Dendrogram showing alignment of the identified phage-like element PBSX protein XkdK (A0A518VEB0) of *Bl* 1821L and *Bl* 1951 with similar proteins of defective prophages of *Bs* W23 (E0U1S9), *Bs* 168 (P54331), and *Bacillus* phage PBP180 (R4JQA6). Key is 0.2 nt substitutions per site.**



**Figure S17. Amino acids alignment of tail protein (A0A518VEA0) encoded in PBSX-like region of *B/* 1821L and *B/* 1951 with the similar proteins of the defective prophages PBSZ, PBSX, and PBP180 using programme CLUSTALO.**

|            |                  |     |                                                                |     |
|------------|------------------|-----|----------------------------------------------------------------|-----|
| A0A518VEA0 | A0A518VEA0 BRELA | 1   | -----MNNDMVVELLSVQKEMYKVRQGMMEWKRDA--VSL--QVANGQMGRDFLRE       | 47  |
| EOU1T3     | EOU1T3 BACFZ     | 1   | MAKLARFDMEDRVS-----KKLRKVQNGFRALEKYRKMVQRKSAIDIRKDSKITLRT      | 53  |
| R4JJ03     | R4JJ03_9CAUD     | 1   | -----                                                          | 0   |
| P54334     | XKDO_BACSU       | 1   | MAKLARFDELDKVS-----KKLKRIHKGFEVEKKVKTINRQIKISIRAEDQAFY--       | 51  |
|            |                  |     |                                                                |     |
| A0A518VEA0 | A0A518VEA0 BRELA | 48  | TDKMERRIK-----ELHSQKRLGT-----                                  | 67  |
| EOU1T3     | EOU1T3 BACFZ     | 54  | IDRIQKSLKKKLGSMISISAEDNASAVIQVQTQLQGLPASVSINIGASDQATERFERL     | 113 |
| R4JJ03     | R4JJ03_9CAUD     | 1   | -----                                                          | 0   |
| P54334     | XKDO_BACSU       | 52  | -----                                                          | 51  |
|            |                  |     |                                                                |     |
| A0A518VEA0 | A0A518VEA0 BRELA | 68  | -----                                                          | 67  |
| EOU1T3     | EOU1T3 BACFZ     | 114 | RELVAGFKGFTIIVLSAEDQVSPAVQKIQRYSMETALKNGYSVTIRVIDHVMKTVGRISAGI | 173 |
| R4JJ03     | R4JJ03_9CAUD     | 1   | -----                                                          | 0   |
| P54334     | XKDO_BACSU       | 52  | -----                                                          | 51  |
|            |                  |     |                                                                |     |
| A0A518VEA0 | A0A518VEA0 BRELA | 68  | ----SVQAKLRVTIDDQATQKISQ-----MRSQISQSLVISGGGSSGGSKASVMDPMG     | 116 |
| EOU1T3     | EOU1T3 BACFZ     | 174 | DALTGKDNKLELAINDKVSQKLDLQKRIKIDSMRSGSPDKAAPSAGGNTGDIASMFDPET   | 233 |
| R4JJ03     | R4JJ03_9CAUD     | 1   | -----                                                          | 0   |
| P54334     | XKDO_BACSU       | 52  | -----                                                          | 51  |
|            |                  |     |                                                                |     |
| A0A518VEA0 | A0A518VEA0 BRELA | 117 | DY-----LINSYNDAIPDSQAAAKE-----RGLFMARGKT---ELEGQ---ELD         | 154 |
| EOU1T3     | EOU1T3 BACFZ     | 234 | ILTALDKFASSFMEKVDEIATKFSPETILTDLKFTTSFMNKVDATKFSPEITILTQLD     | 293 |
| R4JJ03     | R4JJ03_9CAUD     | 1   | -----                                                          | 0   |
| P54334     | XKDO_BACSU       | 52  | -----                                                          | 51  |
|            |                  |     |                                                                |     |
| A0A518VEA0 | A0A518VEA0 BRELA | 155 | -----RSVGRMTQINPEM                                             | 167 |
| EOU1T3     | EOU1T3 BACFZ     | 294 | KFTTSFMSKVDAIATKFSPETILTQLDKFTTSFMSKVDAIATKFSPETILGQLDKFTTSF   | 353 |
| R4JJ03     | R4JJ03_9CAUD     | 1   | -----                                                          | 0   |
| P54334     | XKDO_BACSU       | 52  | -----                                                          | 51  |



|            |                  |     |                                                               |     |
|------------|------------------|-----|---------------------------------------------------------------|-----|
| A0A518VEA0 | A0A518VEA0 BRELA | 168 | -----MKAETAIYNRSDEVNPTN----KAEYAEFAAKLSMSTGFTSDQSLKMMALL      | 215 |
| E0U1T3     | E0U1T3_BACFZ     | 354 | MSKVDAIATKFSPEITILEQLDKFTTSFMGKVDAIAAKFSPET-ILSQL-DKFTTSFMNKV | 411 |
| R4JJ03     | R4JJ03_9CAUD     | 1   | -----MKISLEMDEKKLRKFNLSM-----                                 | 19  |
| P54334     | XKDO_BACSU       | 52  | -----RLRKI-----NDYIILKFAKSLEIKVVL-DDQ---VTSKL                 | 82  |
|            |                  |     | : ..                                                          |     |
| A0A518VEA0 | A0A518VEA0 BRELA | 216 | RDSTGVNDPERLANSLOQMST-NMK-----DFSDDFVSSMIKNTSQLGLLMDTPEKMA    | 267 |
| E0U1T3     | E0U1T3_BACFZ     | 412 | DAIATKFSPEITLLKQLDKFTGSFMKKVDEIASKFSPEAFKQLD--KFTGSEFMKKVDDVV | 469 |
| R4JJ03     | R4JJ03_9CAUD     | 20  | -----RRFSVLMSMKLYQ-----GYRDIR--SLANQLNMIPKQMV                 | 52  |
| P54334     | XKDO_BACSU       | 83  | DAIERKL-----KRLPKETKLTVSLVDRTAAAYKK--TKKMIS--NQKLSLLIPDDKV    | 132 |
|            |                  |     | : .. : : . : . .                                              |     |
| A0A518VEA0 | A0A518VEA0 BRELA | 268 | MLVGEIGN-----M---GIPSNGLPLEA-----LKDIALKMSTQGEMSKV            | 304 |
| E0U1T3     | E0U1T3_BACFZ     | 470 | S-----KFSPEV-IFKQLDKFTGSFMKKVDDVVSKFSP-EAIFKQ                 | 507 |
| R4JJ03     | R4JJ03_9CAUD     | 53  | ISIQAQGLDVIKSSIDRLKQSGTSPILLTFKLNDQLSGKMSS-IK-----KSILQL      | 102 |
| P54334     | XKDO_BACSU       | 133 | T-----ST-----VKRIIGYIKKN-----                                 | 146 |
| A0A518VEA0 | A0A518VEA0 BRELA | 305 | LQRGYADGKSPFEAKRLATIESKEVTQLLHSDNKSNDQMAMGRIFMNVASIKDDNVRQE   | 364 |
| E0U1T3     | E0U1T3_BACFZ     | 508 | LDKFADSFMMKKVDDIVS-----KFSPTATIFNELDKFADSFMM-KK               | 545 |
| R4JJ03     | R4JJ03_9CAUD     | 103 | MNRYYMRLNMVDQATT-----AI-----QRIKKT-----                       | 127 |
| P54334     | XKDO_BACSU       | 147 | LKNGYTVKLKVIDEITK-----TV-----NR-----                          | 167 |
|            |                  |     | ... : .. . .                                                  |     |
| A0A518VEA0 | A0A518VEA0 BRELA | 365 | MLNEVGSGSGK---EILQYLEPLIESAGNI-----SA-----G                   | 394 |
| E0U1T3     | E0U1T3_BACFZ     | 546 | VDDVVSKEFSPETIFNELDKFTDSFMKKVDDIVSKFSPDAILTKAEDFLTNIVDKISEKFN | 605 |
| R4JJ03     | R4JJ03_9CAUD     | 128 | -----KSLTMAKHEI-----RVSVDNAKSKLKKRDQAES                       | 158 |
| P54334     | XKDO_BACSU       | 168 | -----LTALRKFEKTYVVKV-----VTKISDKINKKES                        | 198 |
|            |                  |     | * .                                                           |     |
| A0A518VEA0 | A0A518VEA0 BRELA | 395 | LNVNKVADDEA-----EKSYQAAKDQNPWFYMQAQNEVRLAMTELAATVAKDL-----    | 443 |
| E0U1T3     | E0U1T3_BACFZ     | 606 | FLNPDKI-----A-----                                            | 613 |
| R4JJ03     | R4JJ03_9CAUD     | 159 | VVKEKKIKKKP---NATAATKTENKQSWLGNLGNKALKE--IEKYAGDVSDKLKEKLS    | 213 |
| P54334     | XKDO_BACSU       | 199 | LINKETSKESSDKSSDKGSDKNSDKPGWVGKIK-----GWL                     | 235 |
|            |                  |     | ..                                                            |     |
| A0A518VEA0 | A0A518VEA0 BRELA | 444 | -----APGFKILSNGIANVVQSFNKL-----P-QMARLAIEGVVIAFLAKKAKKS       | 488 |
| E0U1T3     | E0U1T3_BACFZ     | 614 | -----NKAKEFFDNIVSKIAKKFEKFSKDIIIEK-VGFFEKIIKGIAEKLVLNDFGGL    | 667 |
| R4JJ03     | R4JJ03_9CAUD     | 214 | RKFWDEKALPWVETKIDYKQEVIGRISEKIKIN-PEEY-----LDKWFNKGLDLI       | 264 |
| P54334     | XKDO_BACSU       | 236 | KDWWTKSAPWIKDTINEIGAFLLDRFERLIEKLKNDVFDKIID-----KI            | 283 |
|            |                  |     | . .. : : : . : *                                              |     |

|            |                  |     |                                                               |     |
|------------|------------------|-----|---------------------------------------------------------------|-----|
| A0A518VEA0 | A0A518VEA0 BRELA | 489 | QGEQGDSEKNI-----TIKKI-----DVKPKITIKNKVN--VTLQDKKKVIQSCSCG     | 533 |
| EOU1T3     | EOU1T3_BACFZ     | 668 | GGKSSGSGKQKQKASKANTNLSTNSNSNRTKKPSMNQKASGSKSKSGGKGGGAGGCCAG   | 727 |
| R4JJ03     | R4JJ03_9CAUD     | 265 | GPKNQSSNNNTNSSAQNTTETP-----TNPTPTNTQ--QNNRNGKGLFRSSCPCCARG    | 316 |
| P54334     | XKDO_BACSU       | 284 | GPQKKDDSGEN-----S-DTDKKVLN-----RNTGG--NCCDDCEGG               | 318 |
|            |                  |     | : . . . . : . . . . *                                         |     |
| A0A518VEA0 | A0A518VEA0 BRELA | 534 | DS DAGGQQRKKKSGSKGKRKGKRSQKQRGPSKNGGKNSGGASKQNRNPSNPSNQKKPNK  | 593 |
| EOU1T3     | EOU1T3_BACFZ     | 728 | ISTGSKKKVKNRNGSSNKGK-----KSNPVNT-----P--                      | 755 |
| R4JJ03     | R4JJ03_9CAUD     | 317 | LSRRGSNRTRNRNGRSQRQP-----SNPTATA-----RTE                      | 346 |
| P54334     | XKDO_BACSU       | 319 | ISP GTKNNKTYRKKKSPTKA-----PNRTLKV-----PGE                     | 348 |
|            |                  |     | * : : * : . . . . *                                           |     |
| A0A518VEA0 | A0A518VEA0 BRELA | 594 | PNSQPKST---KPLNRKGNIPTPAPSKKGLATGFGKLDIGGKAFEGIKNFGGSTWDGL    | 650 |
| EOU1T3     | EOU1T3_BACFZ     | 756 | -----KSAKA-----A--KGG-----GKGFSGL                             | 772 |
| R4JJ03     | R4JJ03_9CAUD     | 347 | RYRRPQ-GRGLKLTISAGKIFEK-----VPSGLKKTIGIVAS-----VAGLAGL        | 389 |
| P54334     | XKDO_BACSU       | 349 | VIRRRQSGTPASAPR-----T--SGSK-----LKNWLGG                       | 376 |
|            |                  |     | : . . . . *                                                   |     |
| A0A518VEA0 | A0A518VEA0 BRELA | 651 | -KNLGGK-G----LGGAKSFGKGLLKIPFVGEAMGLASLATS DNKPM--ELLKLG----  | 698 |
| EOU1T3     | EOU1T3_BACFZ     | 773 | LKTLGESKG----LKGGLKGLKGAAGIPGLGEILSLTDLAGINKDNAGEKVGSGGGGLA   | 828 |
| R4JJ03     | R4JJ03_9CAUD     | 390 | MKGSGGLSGLDVLKNIGKSSQLLRVPIILGNLLSATDLIGTTKENVGEKVGGSGLA      | 449 |
| P54334     | XKDO_BACSU       | 377 | LKSLGKDS-----KL--GKAFRGMGKAVPYVGSALAVFDLAGINKDNAGEKVGSI GGRIA | 430 |
|            |                  |     | * * . . . . * : * : . . . . *                                 |     |
| A0A518VEA0 | A0A518VEA0 BRELA | 699 | GSAGMKAVGTMIGATVGSIVPGLGTAVGGVVGGLGSVGGDFLMDKL----PDWFGWGKE   | 754 |
| EOU1T3     | EOU1T3_BACFZ     | 829 | GAAAG-----AAIGSVVPGVGTAGGVVGG-----IAGTEGGESLKG-----AIDAGA-    | 871 |
| R4JJ03     | R4JJ03_9CAUD     | 450 | GGISGAAI-----GTLIPI-PFVGAAGVGGVAGSIAGTLGGSKL-----GELEDTSKL    | 496 |
| P54334     | XKDO_BACSU       | 431 | GAEAGATAGAEAGATIGSFVGPETAGGAIIGGIGGLVGGIGGEEAGKNIGKMEEDTSKL   | 490 |
|            |                  |     | * . . . . * : : * : : . . . . *                               |     |
| A0A518VEA0 | A0A518VEA0 BRELA | 755 | KPQPPAPV-----P-----PPAPVPPAQPPIPTDFDASQIKPMRRKPQNTLA          | 797 |
| EOU1T3     | EOU1T3_BACFZ     | 872 | -----LNDTWNSITEGAQNAWSAIQGTWGTVSTWFTDNV-----WTPVSSAV          | 913 |
| R4JJ03     | R4JJ03_9CAUD     | 497 | KENISNTLFSEDWWSEKWSVKTSAEKSGLNLSKWKEDIKTASNTLFSNWWAEQAGYI     | 556 |
| P54334     | XKDO_BACSU       | 491 | KESISNSLNFKEWWSGKWSNISDTANGAITWIEDTWSKVSTWFDQYV-----FTPIYNVA  | 545 |
|            |                  |     | : : *                                                         |     |
| A0A518VEA0 | A0A518VEA0 BRELA | 798 | ITPAPPVKPVATNAVNNKESAQNLSTVSTMPITLHADGVLQDVVGMIRLLKDPSVTNEV   | 857 |
| EOU1T3     | EOU1T3_BACFZ     | 914 | MGV---ATSIWSNIVNAWTTIQTIFSTV---STWFMDNVWTPVSSAV-----GV        | 957 |
| R4JJ03     | R4JJ03_9CAUD     | 557 | TGA---LE-----STVFNGEWWSEKWDATK-----DW                         | 580 |
| P54334     | XKDO_BACSU       | 546 | VPV---INFIVGLFAYAWDGILAVWNIV---YPWFKDNVWDPISGAVT-----NV       | 589 |
|            |                  |     | . . . . *                                                     |     |



|            |                  |      |                                                                |      |
|------------|------------------|------|----------------------------------------------------------------|------|
| AOA518VEAO | AOA518VEAO BRELA | 858  | KRIIETAFVNALETRGGKA-----                                       | 876  |
| EOU1T3     | EOU1T3_BACFZ     | 958  | ATAIWSKIVNAWTTIKNVFSTVASWFMSNVWGPVKS AVIGAATTIWDKMTGAWTKIKSV-  | 1016 |
| R4JJ03     | R4JJ03_9CAUD     | 581  | TQEKWDGAVEIWNSTIKKLGE--TVFNGEWGGEKWD SVKKWTKEKWDGAVNIWNSTIKGKI | 638  |
| P54334     | XKDO_BACSU       | 590  | ATTIWTGLCNANTVISGIWSTVSTWFMNDVWNPVSEAVTTAATWIWSKINDAWTIIISNI-  | 648  |
| :          |                  |      |                                                                |      |
| AOA518VEAO | AOA518VEAO BRELA | 877  | -----                                                          | 876  |
| EOU1T3     | EOU1T3_BACFZ     | 1017 | -----FSTVSGWFMDIVWNPVKNTVLDVVGKGISDAFKKAIDTVKNIWKGLSG          | 1063 |
| R4JJ03     | R4JJ03_9CAUD     | 639  | RETVFNKDWGGEKWDVKNWSE-NKWEQSKTIWS-AAKATASSTLFNKNWWTNKWNDVKS    | 696  |
| P54334     | XKDO_BACSU       | 649  | -----WTGVSNNWFYDNVWNPVIVKKVEDIKTSIKEKFDDARKFFEDAWDGIET         | 695  |
| AOA518VEAO | AOA518VEAO BRELA | 877  | -----                                                          | 876  |
| EOU1T3     | EOU1T3_BACFZ     | 1064 | WFKKNIQEPLTKVGEAISDAFSKAFGWVKQIWDKAGGVASKVINFTVGGGD-----       | 1114 |
| R4JJ03     | R4JJ03_9CAUD     | 697  | WGKNILG-----DTWDLIKSKGAEVIGRH-----IV--                         | 722  |
| P54334     | XKDO_BACSU       | 696  | WFNEHVKDPLVKVSEKIAEK----FQWLFDLKDSVGGFVAKVIHRGEEVTHLKKKPIKKD   | 751  |
| AOA518VEAO | AOA518VEAO BRELA | 877  | -----                                                          | 876  |
| EOU1T3     | EOU1T3_BACFZ     | 1115 | -----PNKGKDPDKKATGGYITKPTISWIGEAGKEFVIPV                       | 1149 |
| R4JJ03     | R4JJ03_9CAUD     | 723  | -----KFEKGREKGRKDFKPDQKATGGYITQPTLSWIGEAGNEFVIPT               | 765  |
| P54334     | XKDO_BACSU       | 752  | SKEKKTSSKPTTNNIFAQSPSNNMTVFQALDQATGGYITKPTISWIGEAGKEFVIPV      | 811  |
| AOA518VEAO | AOA518VEAO BRELA | 877  | -----                                                          | 876  |
| EOU1T3     | EOU1T3_BACFZ     | 1150 | DNNRGRGKMILLSQAASKLGMQVDDMG-AASSSSGNFVSVSGGAASSPLSGSASP-SMDT   | 1207 |
| R4JJ03     | R4JJ03_9CAUD     | 766  | QNNRGRGKMILLAQAASHLGMSVSPSSGAASPVSSSPAPITPNAPAAPTASAGSIGGTVS   | 825  |
| P54334     | XKDO_BACSU       | 812  | DNNRGRGKMILLSQAASKLGMQVDDMG-AASSSGGSPASVSGGAASVPLSGTASP-VMNT   | 869  |
| AOA518VEAO | AOA518VEAO BRELA | 877  | -----                                                          | 876  |
| EOU1T3     | EOU1T3_BACFZ     | 1208 | ANLTGQASTLGQQFSEGFGKGISNQPVKMEDWKKKNINTPFTQMISSSQNYGQMVSQGYA   | 1267 |
| R4JJ03     | R4JJ03_9CAUD     | 826  | MNGNIQSASIGEQFNHDFEQGLNQKVSLDQWKQKNIQPFNQMTSDSGKYQQQTVSAFA     | 885  |
| P54334     | XKDO_BACSU       | 870  | ANLTGQASTLGQQFSEGFGKGISDQPVKMEDWKKKNINTPFTQMISASPNYGQMVSQGYA   | 929  |
| AOA518VEAO | AOA518VEAO BRELA | 877  | -----                                                          | 876  |
| EOU1T3     | EOU1T3_BACFZ     | 1268 | KGQNGTATGTDGFLQSKVKTPFQATVKNSSSSWGTETVKGFAQQONSTQTGTAQYVSTHVD  | 1327 |
| R4JJ03     | R4JJ03_9CAUD     | 886  | TGQQMTPTGTDSFLQSRVKAPYQQVMTASPTWGSSTVSGFATGQONATSIGTSQYVDQHVK  | 945  |
| P54334     | XKDO_BACSU       | 930  | KGQSGTATGTDGFLQSKVKTPFQATVSKSSSSWGTGTVKGFAQQONSTQTGTAQYVSTHVD  | 989  |

|            |                  |      |                                                                |      |
|------------|------------------|------|----------------------------------------------------------------|------|
| A0A518VEA0 | A0A518VEA0 BRELA | 877  | -----                                                          | 876  |
| E0U1T3     | E0U1T3_BACFZ     | 1268 | KGQNGTATGTDGFLQSKVKTPFQATVVKSSSSWGTETVKGFAGQONSTQTGTAYVSTHVD   | 1327 |
| R4JJ03     | R4JJ03_9CAUD     | 886  | TGQQMTPTGTDSFLQSRVKAPYQQVMTASPTWGSSTVSGFATGQNATSIGTSQYVDQHVK   | 945  |
| P54334     | XKDO_BACSU       | 930  | KGQSGTATGTDGFLQSKVKTPFQATVSKSSSSWGTGTVKGFAGQONSTQTGTAYVSTHVD   | 989  |
| A0A518VEA0 | A0A518VEA0 BRELA | 877  | -----                                                          | 876  |
| E0U1T3     | E0U1T3_BACFZ     | 1328 | KPFLRSKDTSSNSWGSVMVGNFVTGMNSKSSEVKQAADMAKRVEQAFREELDIHSPSRVM   | 1387 |
| R4JJ03     | R4JJ03_9CAUD     | 946  | QPFLQAKQESPGWGSMDAFNSGMRKASEVTQAAKEMAKKVEQAFREELDIHSPSRVM      | 1005 |
| P54334     | XKDO_BACSU       | 990  | KPFLRSKDTSSNSWGSGLIGNFVTGMNSKSSEVKQAADMAKRVEQAFREELDIHSPSRVM   | 1049 |
| A0A518VEA0 | A0A518VEA0 BRELA | 877  | -----                                                          | 876  |
| E0U1T3     | E0U1T3_BACFZ     | 1388 | MSLGRFASIGVVKGLGSDVDVKKYAEKQAGSLAAAYSVMGAMSGNVKQWIMAAALMATKTPM | 1447 |
| R4JJ03     | R4JJ03_9CAUD     | 1006 | MSLGKFASIGVVKGLDSDVDVKKFAENQAGSLIGAFSGMGASGLSVQQWLMAALMATGTSM  | 1065 |
| P54334     | XKDO_BACSU       | 1050 | MSLGRFASVGVVKGLDSDVDVKKYAEKQAGSLAAAYSVMGAVGVGNVQWLMAAIMATKTPM  | 1109 |
| A0A518VEA0 | A0A518VEA0 BRELA | 877  | -----                                                          | 876  |
| E0U1T3     | E0U1T3_BACFZ     | 1448 | SWLPGLMTIAQHESGGNPNAINLWDSNAKAGHPSQGLMQTIPSTFNDHKAPSMGNIKNPI   | 1507 |
| R4JJ03     | R4JJ03_9CAUD     | 1066 | SWLPGLMTIAQHESNGNPNKAINLWDSNAKAGTSPKGLMQTIGPTFHSNKGKGMNDIWNPI  | 1125 |
| P54334     | XKDO_BACSU       | 1110 | SWLSGLMTIAQYESSGNPNINLWDSNAKAGNPSQGLMQTIVPTTFNAHKAPGMGNIKNPI   | 1169 |
| A0A518VEA0 | A0A518VEA0 BRELA | 877  | -----                                                          | 876  |
| E0U1T3     | E0U1T3_BACFZ     | 1508 | HNAAAAIGYIKSRYGSINNVPGIKSLNHGGPYVGYANGGLITKEQIARVGEKNKREWIIP   | 1567 |
| R4JJ03     | R4JJ03_9CAUD     | 1126 | HNAVAAINIYIKGRYGTVFNTPLRSMRRGGPYKGYANGGLITQEVARVGEKNKREWIIP    | 1185 |
| P54334     | XKDO_BACSU       | 1170 | HNAAAAIGYIKSRYGSIDNVPGIKSLKRGGPYVGYANGGLITKEQIARVGEKNKREWIIP   | 1229 |
| A0A518VEA0 | A0A518VEA0 BRELA | 877  | -----                                                          | 876  |
| E0U1T3     | E0U1T3_BACFZ     | 1568 | EERGIRGRYLLQKAAQALGMEVTDPSQSQ-SDLSSGQVSAI-TAGTRQTIHTAGTKEIKI   | 1625 |
| R4JJ03     | R4JJ03_9CAUD     | 1186 | EERGIRGRYLLTQAAKALGMQVYDPSNASAPL-PESQMQQVTSASAGNTTTSNGKQITI    | 1244 |
| P54334     | XKDO_BACSU       | 1230 | EERGIRGRYLLQRAAQALGMEVTDPSQSQSELSSGQVSAV-TSASRPTAAVSGSKEIYI    | 1288 |
| A0A518VEA0 | A0A518VEA0 BRELA | 877  | -----                                                          | 876  |
| E0U1T3     | E0U1T3_BACFZ     | 1626 | EFNGDQHFHNEQDADSLVAKIKQALLDELQKDINTGTGKVVAFD                   | 1669 |
| R4JJ03     | R4JJ03_9CAUD     | 1245 | QFNGDQHFHNGDQDQSLVEKIRQMLVDELEVELQGTGKVVIDG                    | 1288 |
| P54334     | XKDO_BACSU       | 1289 | QFNGDQHFHNGQDAESLAAKIKQALIDELQKDINIGTKGVVAFD                   | 1332 |

\*Highlighted dark grey color amino acids denote similarity among the aligned phage-like element PBSX protein XkdK.  
(Refer to SM Tables S15 & S16)

**Table S15. Distance matrices of tail protein (A0A518VEA0) encoded in PBSX-like region of *B/* 1821L and *B/* 1951 with the similar proteins of the defective prophages PBSZ, PBSX, and PBP180.**

| Uniprot Accession #<br>( <a href="https://www.uniprot.org">https://www.uniprot.org</a> ) | Uniprot Accession #<br>( <a href="https://www.uniprot.org">https://www.uniprot.org</a> ) |        |        |            |
|------------------------------------------------------------------------------------------|------------------------------------------------------------------------------------------|--------|--------|------------|
|                                                                                          | P54334                                                                                   | E0U1T3 | R4JJ03 | A0A518VEA0 |
| P54334                                                                                   |                                                                                          | 0.56   | 0.85   | 0.71       |
| E0U1T3                                                                                   | 0.56                                                                                     |        | 0.84   | 1.73       |
| R4JJ03                                                                                   | 0.85                                                                                     | 0.84   |        | 1.79       |
| A0A518VEA0                                                                               | 0.71                                                                                     | 1.73   | 1.79   |            |

**Table S16. Amino acids alignment (%) of tail protein (A0A518VEA0) encoded in PBSX-like region of *B/* 1821L and *B/* 1951 with the similar proteins of the defective prophages PBSZ, PBSX, and PBP180.**

| Uniprot Accession #<br>( <a href="https://www.uniprot.org">https://www.uniprot.org</a> ) | Uniprot Accession #<br>( <a href="https://www.uniprot.org">https://www.uniprot.org</a> ) |        |        |            |
|------------------------------------------------------------------------------------------|------------------------------------------------------------------------------------------|--------|--------|------------|
|                                                                                          | P54334                                                                                   | E0U1T3 | R4JJ03 | A0A518VEA0 |
| P54334                                                                                   |                                                                                          | 51     | 37     | 0          |
| E0U1T3                                                                                   | 51.9                                                                                     |        | 37.1   | 50         |
| R4JJ03                                                                                   | 37                                                                                       | 37.1   |        | 0          |
| A0A518VEA0                                                                               | 0                                                                                        | 50     | 0      |            |



**Figure S18. Amino acids alignment of holin protein (A0A075R9K7) encoded in PBSX-like region of *B/* 1821L and *B/* 1951 with the similar protein of the defective prophages PBSZ, PBSX, and PBP180 using programme CLUSTALO.**

|            |                  |    |                                                              |    |
|------------|------------------|----|--------------------------------------------------------------|----|
| A0A075R9K7 | A0A075R9K7_BRELA | 1  | -----MEESS---VMNALQQGP-----FAAL                              | 18 |
| EOU1U5     | EOU1U5_BACFZ     | 1  | MKMFDKGTVIRTVLLLVALLINQTMMLGKSPLDIQEEQVNQLADALYSAGSVIFTIGTTL | 60 |
| R4JHG4     | R4JHG4_9CAUD     | 1  | MKTFDKGTVIRTVLLLFIALINQTLVMFGQTVLPISEEQVQTAGEALYVAGSTIFTMTAV | 60 |
| Q99163     | XHLB_BACSU       | 1  | MNTFDKGTVIRTVLLLLIALINQTMMLGKSPLDIQEEQVNQLADALYSAGSIAFTIGTTL | 60 |
|            |                  |    | ***:***                                                      |    |
| A0A075R9K7 | A0A075R9K7_BRELA | 19 | FVWLLFS--TKKEGRDREALIVKQAQTEAKLMEHNERMVIQLERNTSTLQQIERSLSGL  | 76 |
| EOU1U5     | EOU1U5_BACFZ     | 61 | AAWFKNNYVTEKGKKQORD-LIKENNLTK-----                           | 87 |
| R4JHG4     | R4JHG4_9CAUD     | 61 | IAWFKNNYVTEKGQLQKD-ALKQRLTK-----                             | 87 |
| Q99163     | XHLB_BACSU       | 61 | AAWFKNNYVTEKGKKQORD-LLRDNNLTK-----                           | 87 |
|            |                  |    | .*: . * * : : * .. * :                                       |    |
| A0A075R9K7 | A0A075R9K7_BRELA | 77 | EMELQELKEKVE                                                 | 88 |
| EOU1U5     | EOU1U5_BACFZ     | 88 | -----                                                        | 87 |
| R4JHG4     | R4JHG4_9CAUD     | 88 | -----                                                        | 87 |
| Q99163     | XHLB_BACSU       | 88 | -----                                                        | 87 |

**\*Highlighted dark grey color amino acids denote similarity among the aligned holin proteins.  
(Refer to SM Figure S19 & Tables S17 and S18)**

**Table S17. Distance matrices of holin protein (A0A075R9K7) encoded in PBSX-like region of *B/* 1821L and *B/* 1951 with the similar proteins of the defective prophages PBSZ, PBSX, and PBP180.**

| Uniprot Accession #<br>( <a href="https://www.uniprot.org">https://www.uniprot.org</a> ) | Uniprot Accession #<br>( <a href="https://www.uniprot.org">https://www.uniprot.org</a> ) |        |        |        |
|------------------------------------------------------------------------------------------|------------------------------------------------------------------------------------------|--------|--------|--------|
|                                                                                          | A0A075R9K77                                                                              | E0U1U5 | R4JHG4 | Q99163 |
| A0A075R9K77                                                                              |                                                                                          | 2.41   | 1.48   | 1.89   |
| E0U1U5                                                                                   | 2.41                                                                                     |        | 0.45   | 0.08   |
| R4JHG4                                                                                   | 1.48                                                                                     | 0.45   |        | 0.47   |
| Q99163                                                                                   | 1.89                                                                                     | 0.08   | 0.47   |        |

**Table S18. Amino acids alignment (%) of holin protein (A0A075R9K7) encoded in PBSX-like region of *B/* 1821L and *B/* 1951 with the similar proteins of the defective prophages PBSZ, PBSX, and PBP180.**

| Uniprot Accession #<br>( <a href="https://www.uniprot.org">https://www.uniprot.org</a> ) | Uniprot Accession #<br>( <a href="https://www.uniprot.org">https://www.uniprot.org</a> ) |        |        |        |
|------------------------------------------------------------------------------------------|------------------------------------------------------------------------------------------|--------|--------|--------|
|                                                                                          | A0A075R9K77                                                                              | E0U1U5 | R4JHG4 | Q99163 |
| A0A075R9K77                                                                              |                                                                                          | 13.6   | 11.4   | 13.6   |
| E0U1U5                                                                                   | 13.6                                                                                     |        | 64.4   | 89.8   |
| R4JHG4                                                                                   | 11.4                                                                                     | 64.4   |        | 61.4   |
| Q99163                                                                                   | 13.6                                                                                     | 89.8   | 61.6   |        |

Figure S19. Schematic presentation of amino acids alignment of holin protein (A0A075R9K7) encoded in PBSX-like region of *B/* 1821L and *B/* 1951 with the similar proteins of the defective prophages PBSZ, PBSX, and PBP180 using programme Geneious basic (A) and CLUSTALO (B).

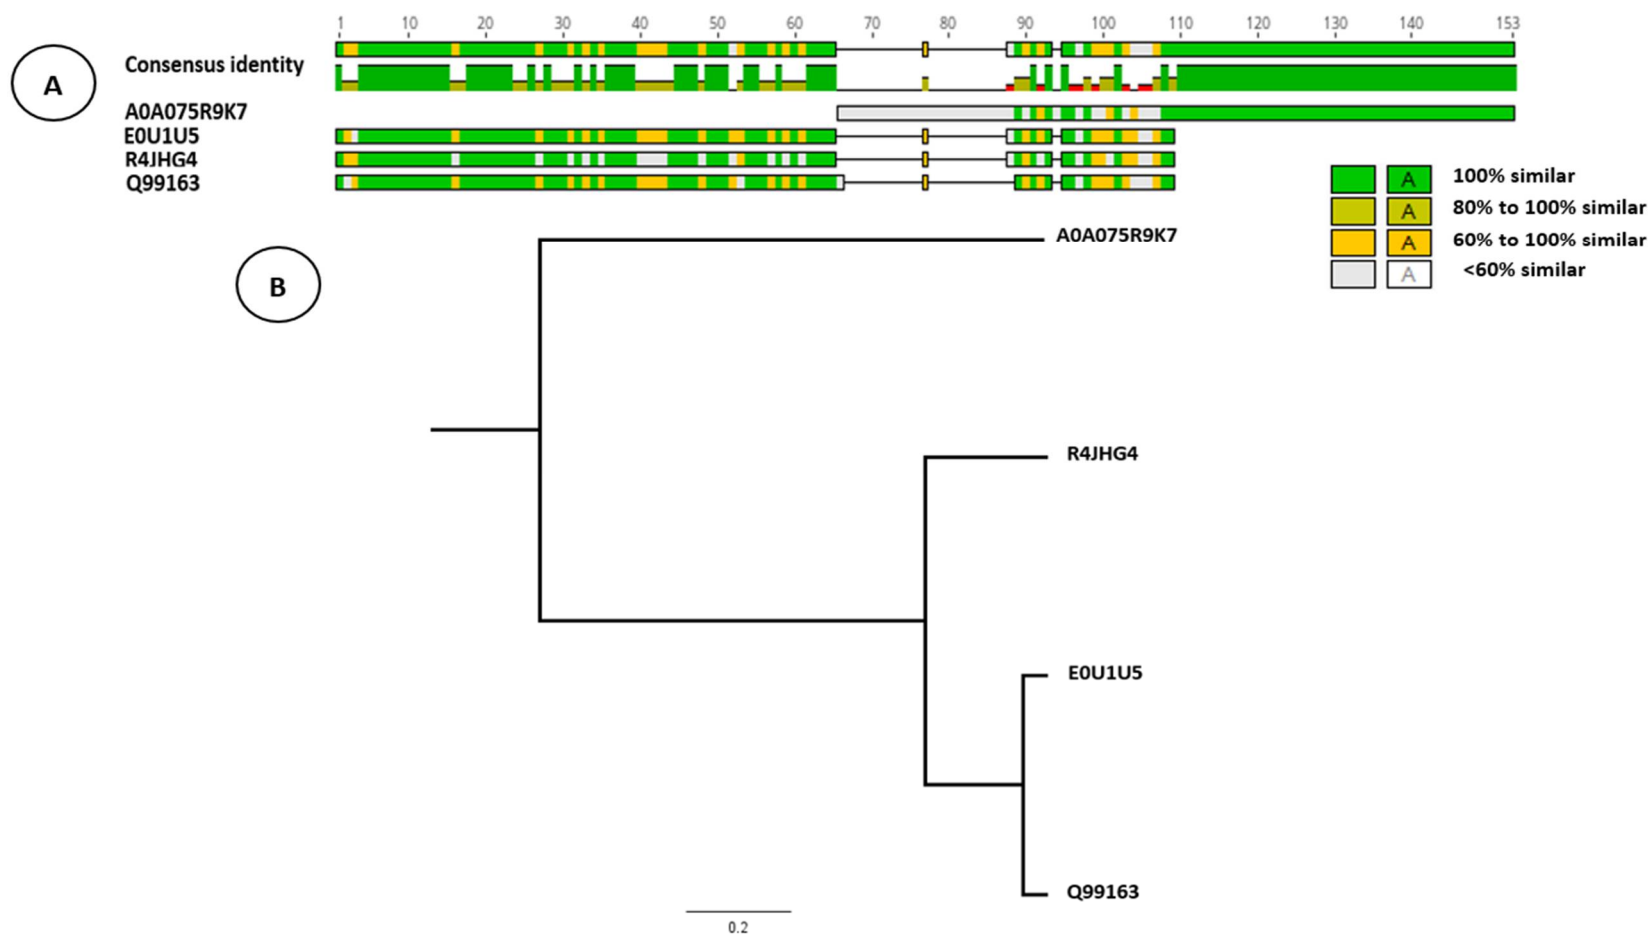

**Figure S20. Amino acids alignment of N-acetylmuramoyl-L-alanine amidase protein (A0A518VEA4) encoded in PBSX-like region of *B/ 1821L* and *BI 1951* genome with the similar proteins of the defective prophages PBSZ, PBSX, and PBP180 using the programme CLUSTALO.**

|            |                  |     |                                                                |     |
|------------|------------------|-----|----------------------------------------------------------------|-----|
| A0A518VEA4 | A0A518VEA4 BRELA | 1   | -----MEKPIILIDAGHG----GADPGASGNHMQEKDLTLQIGLYQ                 | 37  |
| EOU1U7     | EOU1U7_BACFZ     | 1   | MVNIIQDFIPVGANNRPGYAMTEPLYTVHNTANTAAAGADAEAHARYLKNPDTATS-----  | 55  |
| R4JMV0     | R4JMV0_9CAUD     | 1   | MVKIIQALIPKQNRNRPGNRMKEPLYTVHNTSNTGRGADAANHAAFVARASTGVS-----   | 55  |
| P39800     | XLYA_BACSU       | 1   | MVNIIQDFIPVGANNRPGYAMTEPLYTVHNTANTAVGADAAAHARYLKNPDTTTS-----   | 55  |
|            |                  |     | .*: * . . *** . .: . . .                                       |     |
| A0A518VEA4 | A0A518VEA4 BRELA | 38  | LQRCRELNLPAVITRTIDTTLTSPQRTTLVKQSGATYICISNHINAGGGEGVEAIHSI--F  | 95  |
| EOU1U7     | EOU1U7_BACFZ     | 56  | -----WHFTVDD-----TELYQHL--PLNENGWHAGDGNNGSGNRASIGIE            | 93  |
| R4JMV0     | R4JMV0_9CAUD     | 56  | -----WHFTVDD-----QVLYQHL--PLNENGWHAGDGRGTGNMKSIGIE             | 93  |
| P39800     | XLYA_BACSU       | 56  | -----WHFTVDD-----TELYQHL--PLNENGWHAGDGNNGSGNRASIGIE            | 93  |
|            |                  |     | *.* : *                                                        |     |
| A0A518VEA4 | A0A518VEA4 BRELA | 96  | TSNKLANAQAQVAAEGQRFRRVYTRVGS DGRDYFMHRETGAVETIIMEYGFIDHVGDA    | 155 |
| EOU1U7     | EOU1U7_BACFZ     | 94  | ICENTDGDFAQATANAQWLKLTLMSEHN-----ISLANVVPHKYWSGKECP            | 139 |
| R4JMV0     | R4JMV0_9CAUD     | 94  | ICENAGANFEQAVKNAQWLIRKLMGDLG-----IPLSNVVPHKHWSGKECP            | 139 |
| P39800     | XLYA_BACSU       | 94  | ICENADGDFAKATANAQWLKLTMAEHN-----ISLANVVPHKYWSGKECP             | 139 |
|            |                  |     | :: : : * . : : : . : : : . .                                   |     |
| A0A518VEA4 | A0A518VEA4 BRELA | 156 | QKLTNNWKRYAEAVLKAFSSHIGHPYSPALEEPIDDFQMAVDALVQA-----           | 202 |
| EOU1U7     | EOU1U7_BACFZ     | 140 | RKLLDTWDSFKAGIGGGGSQTYVVKQGDTLT SIARAFGVTVAQLREWN NIEDPNVIQVGQ | 199 |
| R4JMV0     | R4JMV0_9CAUD     | 140 | RKLLNRWDGFKAGIASASTSQMTTAKPVKETS I-----KT                      | 174 |
| P39800     | XLYA_BACSU       | 140 | RKLLDTWDSFKAGIGGGGSQTYVVKQGDTLT SIARAFGVTVAQLQEWNNIEDPNLIRVGQ  | 199 |
|            |                  |     | : ** : * . : . : . . .                                         |     |
| A0A518VEA4 | A0A518VEA4 BRELA | 203 | -----KIITSPDYWKQONAGPNGTVLG                                    | 223 |
| EOU1U7     | EOU1U7_BACFZ     | 200 | VLIVSAPSYAEPELYPLPDGIIKLTTPYTSGEHVFQVQRALAALYFYFDPKGAVNNGIDG   | 259 |
| R4JMV0     | R4JMV0_9CAUD     | 175 | ISTRSTSKINKVKKTYSLPAGILKVIKPLTKGS AVKAVQALASIYFYFDPKGAINNGIDG  | 234 |
| P39800     | XLYA_BACSU       | 200 | VLIVSAPSAAEKPELYPLPDGIIQLTTPYTSGEHVFQVQRALAALYFYFDPKGAVNNGIDG  | 259 |
|            |                  |     | : : : : : : . . : *                                            |     |
| A0A518VEA4 | A0A518VEA4 BRELA | 224 | DYAAQLIKNMA-----NHLKAGA-----                                   | 241 |
| EOU1U7     | EOU1U7_BACFZ     | 260 | IYGPKTADAVARFQSVNGLTADGIYGPATKAKIAAQLS-                        | 297 |
| R4JMV0     | R4JMV0_9CAUD     | 235 | YVGPKTANAVSRFQMMHGLTPDGIYGPKTKETLSKVIES                        | 273 |
| P39800     | XLYA_BACSU       | 260 | VYGPKTADAVARFQSVNGLTADGIYGPATKEKIAAQLS-                        | 297 |
|            |                  |     | *. : . : : : * . . .                                           |     |

**\*Highlighted dark grey color amino acids denote similarity among the aligned N-acetylmuramoyl-L-alanine amidase proteins.  
(Refer to SM Figure S21 & Tables S19 and S20)**

**Table S19. Distance matrices of N-acetylmuramoyl-L-alanine amidase protein (A0A518VEA4) encoded in PBSX-like region of *B/* 1821L and *B/* 1951 with the similar proteins of the defective prophages PBSZ, PBSX, and PBP180 .**

| Uniprot Accession #<br>( <a href="https://www.uniprot.org">https://www.uniprot.org</a> ) | Uniprot Accession #<br>( <a href="https://www.uniprot.org">https://www.uniprot.org</a> ) |        |        |        |
|------------------------------------------------------------------------------------------|------------------------------------------------------------------------------------------|--------|--------|--------|
|                                                                                          | A0A518VEA4                                                                               | E0U1U7 | R4JMV0 | P39800 |
| A0A518VEA4                                                                               |                                                                                          | 0.22   | 1.75   | 1.40   |
| E0U1U7                                                                                   | 0.22                                                                                     |        | 0.55   | 0.05   |
| R4JMV0                                                                                   | 1.75                                                                                     | 0.55   |        | 0.54   |
| P39800                                                                                   | 1.40                                                                                     | 0.05   | 0.54   |        |

**Table S20. Alignment (%) of N-acetylmuramoyl-L-alanine amidase protein (A0A518VEA4) encoded in PBSX-like region of *B/* 1821L and *B/* 1951 with the similar proteins of the defective prophages PBSZ, PBSX, and PBP180.**

| Uniprot Accession #<br>( <a href="https://www.uniprot.org">https://www.uniprot.org</a> ) | Uniprot Accession #<br>( <a href="https://www.uniprot.org">https://www.uniprot.org</a> ) |        |        |        |
|------------------------------------------------------------------------------------------|------------------------------------------------------------------------------------------|--------|--------|--------|
|                                                                                          | A0A518VEA4                                                                               | E0U1U7 | R4JMV0 | P39800 |
| A0A518VEA4                                                                               |                                                                                          | 15.4   | 7.7    | 15.4   |
| E0U1U7                                                                                   | 15.4                                                                                     |        | 53.5   | 95.3   |
| R4JMV0                                                                                   | 7.7                                                                                      | 53.5   |        | 53.9   |
| P39800                                                                                   | 15.4                                                                                     | 95.3   | 53.9   |        |



Figure S21. Schematic presentation of amino acids alignment of N-acetylmuramoyl-L-alanine amidase protein (A0A518VEA4) encoded in PBSX-like region of *Bl* 1821L and *Bl* 1951 with the similar proteins of the defective prophages PBSZ, PBSX, and PBP180 using programme Geneious basic (A) and CLUSTALO (B).

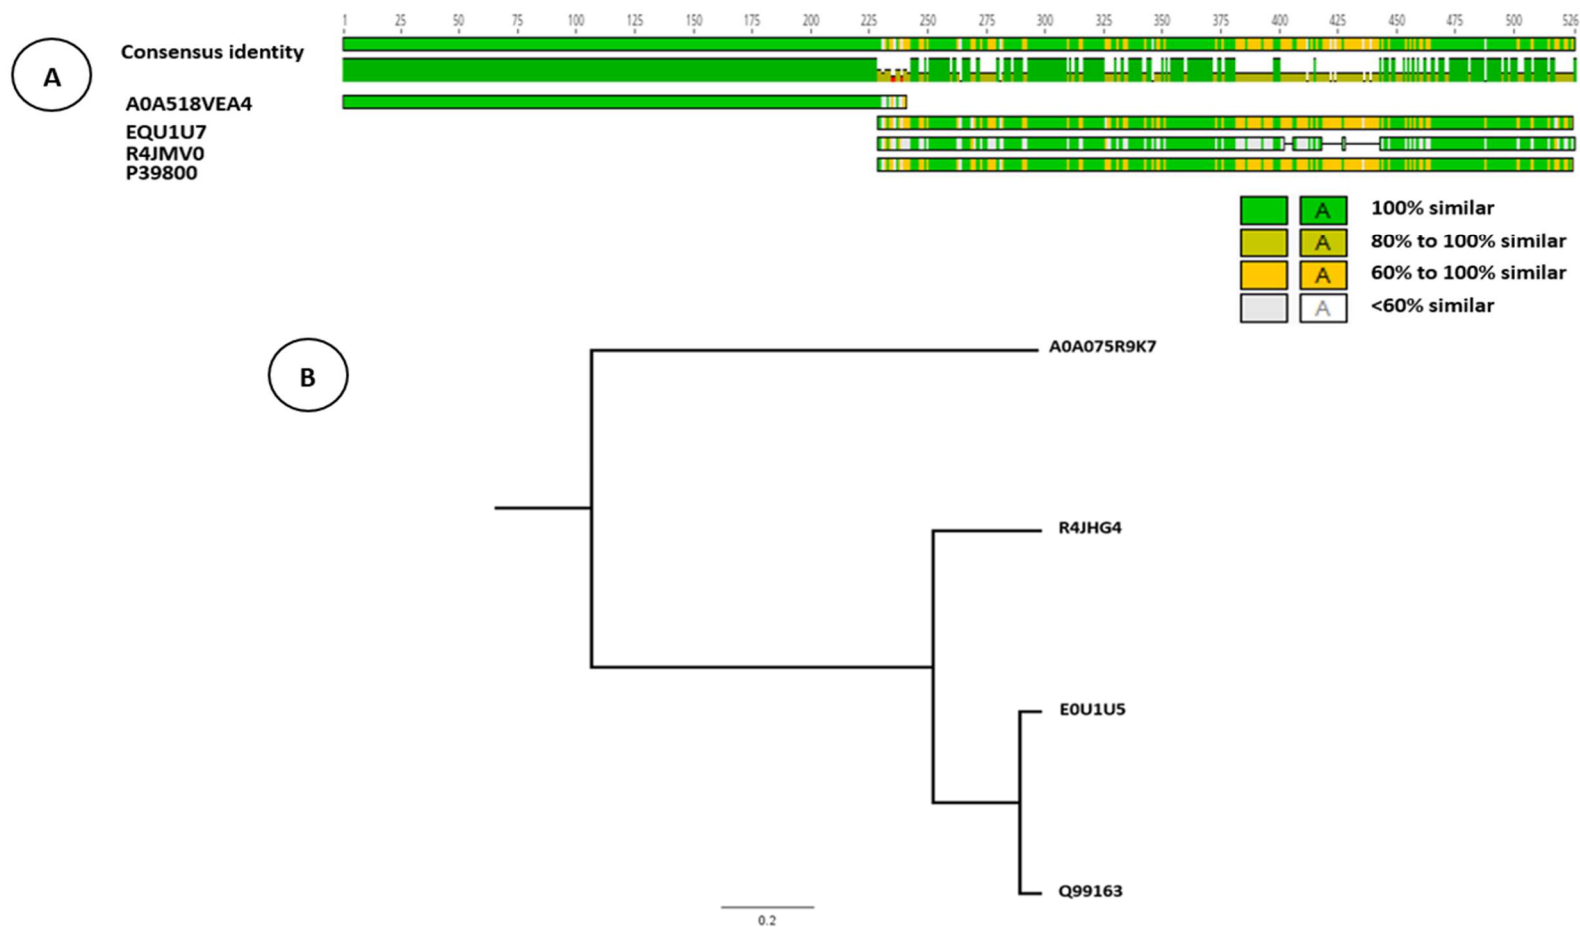

Supplement: s1 [file s1]
